# Supplementary material for: Traditional Chinese medicine injections for heart failure: a protocol for systematic review and network meta-analysis of randomised controlled trials
Source: PubMed Central journal article supplement — BMJ Open. 2020 Sep 28;10(9):e037331. doi: 10.1136/bmjopen-2020-037331 (PMC7523221; doi:10.1136/bmjopen-2020-037331), 2020-09-28
Supplement: bmjopen-2020-037331.draft_revisions.pdf [file bmjopen-2020-037331.draft_revisions.pdf]

# BMJ Open

BMJ Open is committed to open peer review. As part of this commitment we make the peer review history of every article we publish publicly available.

When an article is published we post the peer reviewers' comments and the authors' responses online. We also post the versions of the paper that were used during peer review. These are the versions that the peer review comments apply to.

The versions of the paper that follow are the versions that were submitted during the peer review process. They are not the versions of record or the final published versions. They should not be cited or distributed as the published version of this manuscript.

BMJ Open is an open access journal and the full, final, typeset and author-corrected version of record of the manuscript is available on our site with no access controls, subscription charges or pay-per-view fees (<http://bmjopen.bmj.com>).

If you have any questions on BMJ Open's open peer review process please email [info.bmjopen@bmj.com](mailto:info.bmjopen@bmj.com)

# BMJ Open

## Traditional Chinese medicine injections for heart failure: a protocol for systematic review and network meta-analysis of randomized controlled trials

|                               |                                                                                                                                                                                                                                                                                                                                                                                                                                                                      |
|-------------------------------|----------------------------------------------------------------------------------------------------------------------------------------------------------------------------------------------------------------------------------------------------------------------------------------------------------------------------------------------------------------------------------------------------------------------------------------------------------------------|
| Journal:                      | <i>BMJ Open</i>                                                                                                                                                                                                                                                                                                                                                                                                                                                      |
| Manuscript ID                 | bmjopen-2020-037331                                                                                                                                                                                                                                                                                                                                                                                                                                                  |
| Article Type:                 | Protocol                                                                                                                                                                                                                                                                                                                                                                                                                                                             |
| Date Submitted by the Author: | 29-Jan-2020                                                                                                                                                                                                                                                                                                                                                                                                                                                          |
| Complete List of Authors:     | Lin, Shan-Shan; First Teaching Hospital of Tianjin University of Traditional Chinese Medicine, Cardiovascular Department<br>Shi, Qingyang; Tianjin University of Traditional Chinese Medicine, Graduate school<br>Yang, Fengwen; Tianjin University of Traditional Chinese Medicine, Evidence based Medicine Center<br>Wang, Xianliang<br>Mao, Jingyuan; The First Teaching Hospital of Tianjin University of Traditional Chinese Medicine, Cardiovascular Departmen |
| Keywords:                     | Heart failure < CARDIOLOGY, COMPLEMENTARY MEDICINE, Clinical trials < THERAPEUTICS, Herbal medicine < THERAPEUTICS, Adverse events < THERAPEUTICS                                                                                                                                                                                                                                                                                                                    |
|                               |                                                                                                                                                                                                                                                                                                                                                                                                                                                                      |

SCHOLARONE™  
Manuscripts

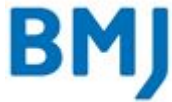

I, the Submitting Author has the right to grant and does grant on behalf of all authors of the Work (as defined in the below author licence), an exclusive licence and/or a non-exclusive licence for contributions from authors who are: i) UK Crown employees; ii) where BMJ has agreed a CC-BY licence shall apply, and/or iii) in accordance with the terms applicable for US Federal Government officers or employees acting as part of their official duties; on a worldwide, perpetual, irrevocable, royalty-free basis to BMJ Publishing Group Ltd ("BMJ") its licensees and where the relevant Journal is co-owned by BMJ to the co-owners of the Journal, to publish the Work in this journal and any other BMJ products and to exploit all rights, as set out in our [licence](#).

The Submitting Author accepts and understands that any supply made under these terms is made by BMJ to the Submitting Author unless you are acting as an employee on behalf of your employer or a postgraduate student of an affiliated institution which is paying any applicable article publishing charge ("APC") for Open Access articles. Where the Submitting Author wishes to make the Work available on an Open Access basis (and intends to pay the relevant APC), the terms of reuse of such Open Access shall be governed by a Creative Commons licence – details of these licences and which [Creative Commons](#) licence will apply to this Work are set out in our licence referred to above.

Other than as permitted in any relevant BMJ Author's Self Archiving Policies, I confirm this Work has not been accepted for publication elsewhere, is not being considered for publication elsewhere and does not duplicate material already published. I confirm all authors consent to publication of this Work and authorise the granting of this licence.

1  
2  
3  
4  
5  
6  
7  
8  
9

# **Traditional Chinese medicine injections for heart failure: a protocol for systematic review and network meta-analysis of randomized controlled trials**

10  
11  
12  
13  
14  
15  
16  
17  
18  
19  
20  
21  
22  
23  
24  
25  
26  
27  
28  
29  
30  
31  
32  
33  
34  
35  
36  
37  
38  
39  
40  
41  
42  
43  
44  
45  
46  
47  
48  
49  
50  
51  
52  
53  
54  
55  
56  
57  
58  
59  
60

Shan-Shan Lin,<sup>1</sup> Qing-Yang Shi,<sup>2</sup> Feng-Wen Yang,<sup>3</sup> Xian-Liang Wang,<sup>1,\*</sup> and Jing-Yuan Mao<sup>1,\*</sup>

<sup>1</sup> Cardiovascular Department, First Teaching Hospital of Tianjin University of Traditional Chinese Medicine, Tianjin 300381, China

<sup>2</sup> Tianjin University of Traditional Chinese Medicine, Tianjin301617, China

<sup>3</sup> Evidence-Based Medicine Center, Tianjin University of Traditional Chinese Medicine, Tianjin301617, China

\* Corresponding author: Xian-Liang Wang and Jing-Yuan Mao.

Xian-Liang Wang, Cardiovascular Department, First Teaching Hospital of Tianjin University of Traditional Chinese Medicine, 88 Changling Road, Xiqing District, Tianjin 300381, China (e-mail: xliwang1981@126.com; telephone number: 0086(22)27986333)

Jing-Yuan Mao, Cardiovascular Department, First Teaching Hospital of Tianjin University of Traditional Chinese Medicine, 88 Changling Road, Xiqing District, Tianjin 300381, China (e-mail: jymao@126.com; telephone number: 0086(22)27986000)

## ABSTRACT

**Introduction:** Heart failure (HF) has always been an important issue in global public health. The research and development of traditional Chinese medicine (TCM) provide more possibilities for improving the prognosis of HF patients. Because multiple traditional Chinese medicine injections (TCMIs) are being widely used clinically, it is important to choose the right TCMIs for HF patients. The purpose of this study is to assess and compare the effect of different TCMIs for HF using network meta-analysis (NMA) and further provide references for clinical decision-making.

**Methods and analysis:** The clinical randomized controlled trials (RCTs) and meta-analyses of TCMIs for treating HF will be searched in the relevant database, including PubMed, EMBASE, Cochrane Library (No.2 of 2020), Chinese BioMedical Literature Database (CBM), China National Knowledge Infrastructure (CNKI), Wan Fang database and VIP database from inception to February 29, 2020. The outcomes of interest include all-cause mortality, rehospitalization rate, left ventricular ejection fraction (LVEF), left ventricular end-diastolic diameter (LVEDD), left ventricular end-systolic diameter (LVESD), brain natriuretic peptide (BNP), cardiac output (CO), stroke volume (SV), 6 minutes walking distance, and adverse events. The risk of bias assessment of the included RCTs will be conducted according to the Cochrane Collaboration's tool for assessing the risk of bias. NMA will be performed in a Bayesian hierarchical framework using R (version 3.6.1) and STATA (version 16.0). Finally, we will rank the efficacy of these treatment programs according to the surface under the cumulative ranking curve (SUCRA), and perform quality assessment and recommendation grading of the evidence according to the Grading of Recommendations Assessment, Development and Evaluation (GRADE) system.

**Ethics and dissemination:** This study will extract data from published literature and not involve private information from individuals or compromise their rights. Therefore, the study does not require ethical approval. The results will eventually be published in a peer-reviewed journal and disseminated at relevant conferences.

### Strengths and limitations of this study

- Compared with traditional pairwise meta-analysis, NMA can comprehensively analyze direct and indirect comparison results of different TCMIs for HF to obtain more reliable conclusions.
- Compared with traditional pairwise meta-analysis, NMA can compare and rank the efficacy of different TCMIs for HF.
- This study can provide more comprehensive suggestions and references for clinical decision-making and guideline development.
- This study did not further explore the efficacy of drugs based on different TCM syndrome types.
- This study did not explore the economic benefits of these drugs, and further exploration can be done based on the results of this study.

## INTRODUCTION

Heart failure (HF) is a complex set of clinical syndromes caused by abnormal changes in the structure and/or function of the heart that impair ventricular contraction and/or diastolic function.<sup>1</sup> HF is a severe end-stage of heart disease. Due to the high mortality rate, HF has become an important public health issue in global public health.<sup>2</sup> According to the 2016 European Society of Cardiology Guidelines for the diagnosis and treatment of acute and chronic heart failure, current treatment options for HF are diverse, generally including cardiotonic, diuretic, vasodilator, angiotensin-converting enzyme inhibitor (ACEI), angiotensin receptor blocker (ARB),  $\beta$ -blocker, and so on. Modern medicine has made great progress in the field of HF, but the prognosis of HF patients is still not satisfactory, resulting in a heavy global burden.<sup>3, 4</sup> The development of new therapeutic drugs is an inevitable trend of future medical development. The research and development of traditional Chinese medicine (TCM) provide more possibilities for improving the prognosis of HF patients. TCM has

1 the advantages of multi-target effect and bidirectional regulation, so it has received more and more attention in the global  
2 medical field.<sup>5-7</sup> With the development of modernization of TCM, more and more traditional Chinese medicine injections  
3 (TCMIs) for the treatment of HF have been developed and widely used in clinical practice. Many studies have shown that  
4 loading TCMIs based on conventional pharmacotherapy (CPT) can effectively improve the clinical symptoms, reduce the  
5 incidence of cardiovascular events and adverse reactions in HF patients.<sup>8-17</sup> However, due to the lack of direct comparison  
6 studies between TCMIs, the comparison results between TCMIs are unclear. Therefore, although the increasing variety of  
7 drugs has provided doctors and patients with more choices, it is also a new challenge to choose the best treatment scheme  
8 at the same time.

10  
11  
12 Meta-analysis is one of the highest levels of evidence in evidence-based research. However, it is difficult to compare the  
13 effects of multiple drugs at the same time by traditional pairwise meta-analysis. Network meta-analysis (NMA) is a further  
14 development based on the traditional pairwise meta-analysis. Based on the current clinical research data, NMA can  
15 complete direct and indirect comparisons between different TCMIs at the same time, and further comprehensively analyze  
16 the results of the direct and indirect comparison, to obtain the efficacy ranking of multiple drugs. At present, some  
17 researchers have performed the NMA on randomized controlled trials (RCTs) of TCMIs for HF.<sup>18, 19</sup> However, there are  
18 some shortcomings in the published literature: ①The types of TCMIs included are not comprehensive. Only a few  
19 commonly used drugs have been studied, which severely limits the development and utilization of other potentially  
20 effective drugs. ②Results of the most important clinical outcomes have not been reported, such as all-cause mortality and  
21 rehospitalization rate. ③The research data has not been updated in the past two years. Therefore, we conceived and  
22 designed this study to make up for the above shortcomings. We will comprehensively retrieve relevant data to assess and  
23 compare the effectiveness and safety of different TCMIs for the treatment of HF using NMA. The results of this study will  
24 provide more timely and comprehensive evidence for clinical decision-making.

## 30 OBJECTIVES

31  
32  
33 We will perform Bayesian reticulated meta-analysis of different TCMIs for HF based on clinical RCTs and meta-analysis.<sup>20</sup>  
34  
35 <sup>21</sup> The purpose is to explore the efficacy and safety of TCMIs in the treatment of HF, and to rank the clinical efficacy of  
36 drugs.

## 38 METHODS AND ANALYSIS

### 41 Inclusion and exclusion criteria

#### 43 *Type of participants*

44  
45  
46 The included studies must indicate that participants have been diagnosed with HF. And HF patients cannot suffer from  
47 serious complications or other organic diseases. There are no restrictions on gender, age, race, duration of disease, source  
48 of the case, and follow-up time.

#### 51 *Type of interventions and comparisons*

52  
53 The following forms of intervention will be included: conventional pharmacotherapy (CPT) + TCMI versus CPT alone,  
54 CPT + TCMI versus CPT + placebo, CPT + TCMI A versus CPT + TCMI B. CPTs include cardiotonic, diuretic,  
55 vasodilator, angiotensin-converting enzyme inhibitor (ACEI), angiotensin receptor blocker (ARB),  $\beta$ -blocker, and so on.  
56 CPTs in the two groups should be the same. These TCMIs must have been included in *the Pharmacopoeia of the People's*  
57 *Republic of China* or approved by *the China Food and Drug Administration*. Neither the treatment group nor the control  
58 group can be combined with other TCM treatment methods, such as TCM decoction, oral Chinese patent medicine,  
59 acupuncture, etc.

## ***Outcomes***

Only studies using at least one of the following outcomes may be included.

### ►Primary outcomes

It is measured by the proportion of patients with endpoint outcome events, including all-cause mortality and rehospitalization rate;

### ►Secondary outcomes

Outcomes related to the following indicators will be included, including ①left ventricular ejection fraction (LVEF); ②left ventricular end-diastolic diameter (LVEDD); ③left ventricular end-systolic diameter (LVESD); ④brain natriuretic peptide (BNP); ⑤cardiac output (CO); ⑥stroke volume (SV); ⑦6 minutes walking distance.

### ►Adverse events

The adverse events that occurred during the study period include allergic reactions, bleeding events, gastrointestinal discomfort, liver and kidney damage, and others.

## ***Type of study***

Randomized controlled trials (RCTs) that investigated the effectiveness and safety of TCHI for HF will be included.

## ***Exclusion criteria***

►Interventions include other TCM treatment methods, such as TCM decoctions, oral Chinese patent medicines, acupuncture, and so on.

►The full text cannot be obtained after seeking help online or contacting the corresponding author via email.

►Studies that do not provide data for synthesis will be excluded.

►Unfinished protocol.

## **Methods of obtaining data and analyzing data**

### ***Search strategy***

The clinical RCTs and meta-analyses of TCMI for treating HF will be searched in the relevant database, including PubMed, EMBASE, Cochrane Library (No.2 of 2020), Chinese BioMedical Literature Database (CBM), China National Knowledge Infrastructure (CNKI), Wan Fang database and VIP database without language restriction. The retrieval time is from inception to February 29, 2020. Search terms include heart failure, traditional Chinese medicine injection, names of TCMI that have been used in the clinic, randomized controlled trial, systemic review, meta-analysis, and their synonyms. The search strategy adopts a combination of Medical Subject Heading and free-text terms, and adopts different search strategies according to the characteristics of each database. The synonyms in the group are connected by “or”, and the search terms between the groups are connected by “and”. At the same time, we will also retrieve conference papers and dissertations, search and browse and review references of meta-analyses, conduct search engines such as Google Scholar to avoid omissions. The development of the search strategy has been completed by the researcher SS Lin with clinical work experience and the researcher QY Shi with evidence-based work experience, and has been modified according to the Cochrane Handbook for Systematic Reviews.<sup>22</sup> Take PubMed as an example. The detailed search strategy is shown in Annex 1.

## Literature screening

Records from databases will be managed by NoteExpress (V3.2.0) software. First, we will import all retrieved records into NoteExpress and exclude duplicate records. Second, by reading the title and abstract of each record, we will exclude records that do not meet the inclusion and exclusion criteria. Finally, we will download and read the full texts of potentially relevant studies to perform the second screening. At the same time, the reasons for excluding records after reading the full text will be reported in detail. Literature screening will be done independently and cross-checked by two researchers (SS Lin and QY Shi). Disagreement will be determined through discussion between the two investigators. When consensus cannot be reached, a third investigator (FW Yang) will assist in the judgment. The literature screening based on PRISMA is shown in Figure 1.<sup>23</sup> In the early stage of the study, we will train the evaluators and conduct pre-tests to ensure a standardized screening process.

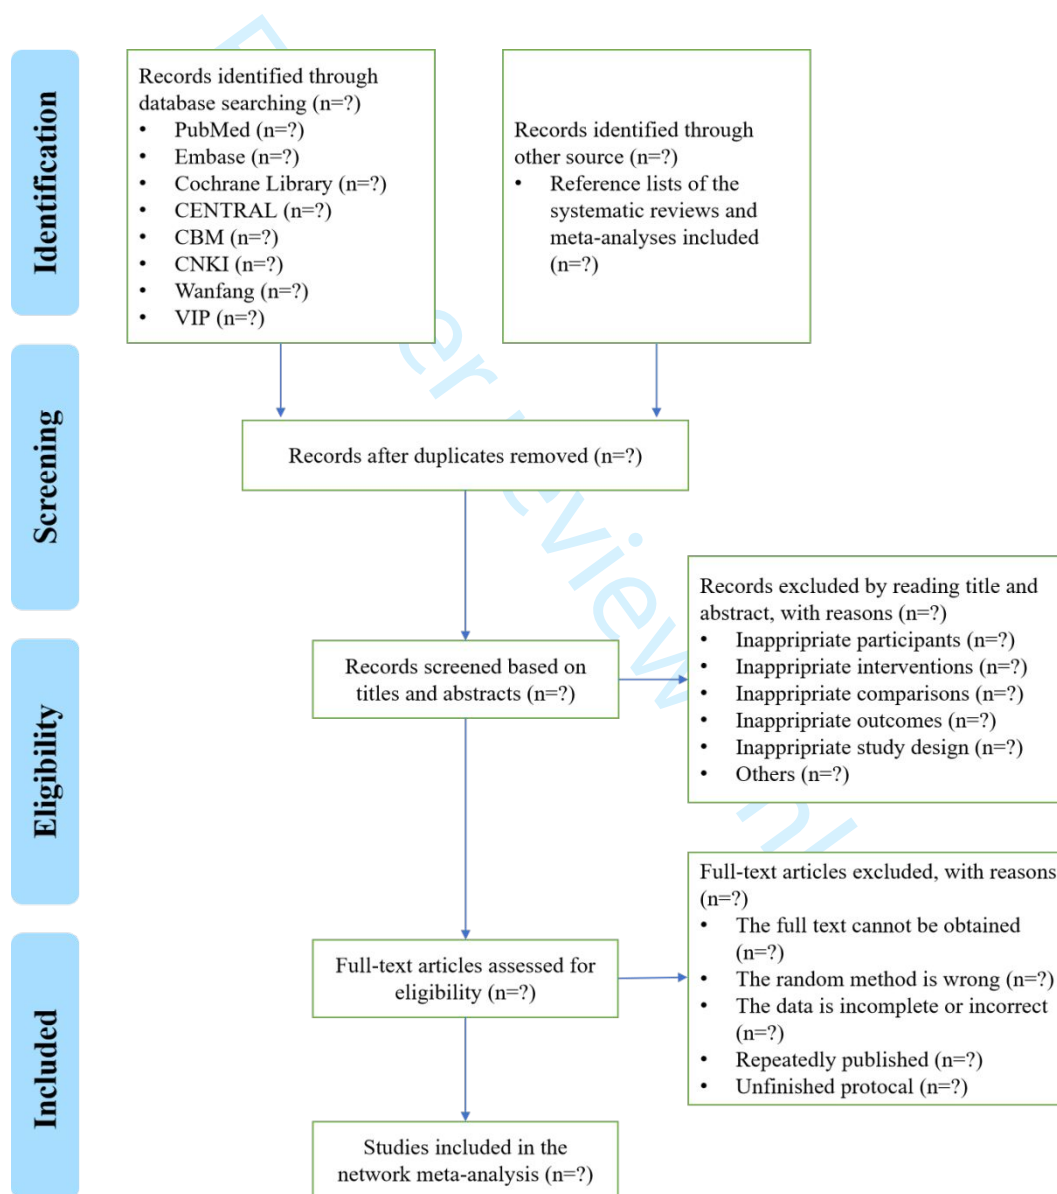

**Figure 1 Proposed flowchart of the literature search process**



## ***Data extraction and management***

Data extraction will be performed independently by two investigators (SS Lin and QY Shi) and cross-checked. Disagreement will be determined through discussion between the two investigators. When consensus cannot be reached, a third investigator (FW Yang) will assist in the judgment. The preset information extraction items are shown in Table 1.

**Table 1 Information extraction items**

| <b>Categories</b>     | <b>Specific items</b>                                                                                                                                                             |
|-----------------------|-----------------------------------------------------------------------------------------------------------------------------------------------------------------------------------|
| Study characteristics | title, first author, journal name, publication year, and type of study                                                                                                            |
| Participants          | diagnostic criteria, sample size, gender, age, ethnicity, case source, and baseline status                                                                                        |
| Intervention          | drug name, medication route, drug dose, course of treatment, and patient compliance                                                                                               |
| Control               | drug name, medication route, drug dose, course of treatment, and patient compliance                                                                                               |
| Outcomes              | whether there is an intention-to-treat, loss to follow-up and withdrawal, outcomes                                                                                                |
| Risk of bias          | random sequence generation, allocation concealment, participant and personnel blinding, outcome assessment blinding, incomplete outcome data, selective reporting, and other bias |
| Others                | author's main conclusions, funding, and others                                                                                                                                    |

## ***Dealing with missing data***

When data is missing, we will contact the original authors for complete data. If the missing value of outcomes cannot be obtained from the original author, we will delete the comparison results related to the missing data and fully consider the risk of bias. If baseline data cannot be obtained, multiple imputations will be used to handle missing values of the baseline data if necessary.

## ***Assessment of risk of bias***

According to the Cochrane Collaboration's tool for assessing the risk of bias in randomized trials,<sup>24</sup> we will assess the risk of bias in the included literature from the following seven items: ①random sequence generation; ②allocation concealment; ③participant and personnel blinding; ④outcome assessment blinding; ⑤incomplete outcome data; ⑥selective reporting; and ⑦other bias. The results of the risk of bias assessment include the low risk of bias, the high risk of bias, and the unclear risk of bias. This process will be done independently by two investigators (SS Lin and QY Shi) and cross-checked. Disagreement will be determined through discussion between the two investigators. When consensus cannot be reached, a third investigator (FW Yang) will assist in the judgment. When there is a difference in the risk of bias between studies, we will try to analyze the impact of risk of bias. The risk of bias graph and the risk of bias summary will be generated by RevMan 5.3.

## **Data analysis**

## ***Pairwise meta-analysis and network meta-analysis***

A Bayesian approach will be used to conduct pairwise meta-analyses and network meta-analyses according to the Markov chain Monte Carlo (MCMC) method.<sup>21</sup> In a Bayesian hierarchical framework, we will assume the vague prior distribution parameters for the between-study heterogeneity with uniform distribution in advance. The convergence of the model will be assessed using the Brooks-Gelman-Rubin plot.<sup>25</sup> Dichotomous variables will be presented as the relative risk (RR) or odds ratio (OR) with a 95% credible interval (CrI). Continuous variables will be presented as the weight mean difference (WMD) with a 95% CrI. The  $\chi^2$  test and  $I^2$  test will be conducted to assess the potential heterogeneity.  $P < 0.05$  is considered statistically significant. To achieve the highest generalisability in the pooled treatment effects, a random-effects model will be used to synthesize the data for pairwise and network meta-analysis.<sup>26</sup> A pairwise meta-analysis will be conducted when at least two studies compared the same intervention and comparator. When the treatment nodes formed a network of evidence, we will do a TCMI to compare different treatment programs using the common comparator or placebo. A network diagram of each outcome will be generated to visualize the connections between different treatment programs included. If direct evidence exists, NMA will conduct a comprehensive evaluation of direct and indirect comparative evidence. If direct comparison evidence is lacking, we will only make adjusted indirect comparisons. For each outcome, a contribution matrix will be performed to demonstrate the percentage contribution of each direct comparison to the whole evidence body. The efficacy of different treatment programs will be ranked according to the surface under the cumulative ranking curve (SUCRA).<sup>27</sup> The SUCRA is a value range from 0 to 1 and can be re-expressed as a percentage. The larger the SUCRA, the better the treatment regimen.

### ***Examination of assumptions in network meta-analysis***

***Heterogeneity*** The Cochran Q statistics will be employed to assess heterogeneity.<sup>28</sup> If there is significant clinical heterogeneity or methodological heterogeneity ( $P < 0.1$ ,  $I^2 > 50\%$ ), the subgroup analysis will be performed to explore sources of heterogeneity. To assess potential bias resulting from baseline risk, we will perform meta-regression with regressors which included age of participants, sample size, duration of disease, course of treatment, and so on. Besides, sensitivity analyses will be performed by excluding studies with a high risk of bias or poor-quality to judge the stability of the results.

***Transitivity*** We will verify the transitivity of this network by plotting the central trends (eg, mean, median) of patient characteristics in each treatment comparison.

***Consistency*** Node-splitting analysis will be used to split mixed evidence into direct evidence and indirect evidence to evaluate the inconsistency of the model. And then, we will compare the direct and indirect evidence. If there is no statistically significant difference between direct and indirect evidence, the study fits the consistency model. If the 95% CrI of the result does not include the invalid value, the inconsistency will be considered to exist.

### ***Assessment of publication bias***

The comparison-adjusted funnel plots will be obtained with the specific ranking order to detect small sample size study effects and publication bias.

All analyses will be conducted using R (version 3.6.1) and STATA (version 16.0).

### **Quality assessment and recommendation grading of the evidence**

Two reviewers (SS Lin and QY Shi) will independently perform quality assessment and recommendation grading of the evidence of the direct, indirect and mixed estimates of all comparisons according to GRADE criteria. In particular, the GRADE system was used to rank the quality of evidence for direct comparison from four aspects: limitation, inconsistency, indirectness, and publication bias, but without imprecision.<sup>31</sup> The grading of the evidence quality includes four levels,

1 which are 'high', 'medium', 'low' or 'very low' according to the GRADE rating standards.<sup>32, 33</sup> High indicates that the  
2 authors are very confident that the real effect is close to the estimate of the effect. Moderate indicates that the authors are  
3 moderately confident in the effect estimate: the true effect is likely to be close to the estimate of the effect, but there is a  
4 possibility that it is substantially different. Low indicates that the authors' confidence in the effect estimate is limited: the  
5 true effect may be substantially different from the estimate of the effect. Very low indicates that the authors have very little  
6 confidence in the effect estimate: the true effect is likely to be substantially different from the estimate of effect.<sup>29</sup> Cross-  
7 checking will be performed after the classification is completed. In case of disagreement, it will be decided by discussion  
8 between the two parties or judged by the third evaluator (FW Yang).  
9

10  
11  
12 **Ethics and dissemination** This study will extract data from published literature and not involve private information  
13 from individuals or compromise their rights. Therefore, the study does not require ethical approval. The procedures of this  
14 systematic review and network meta-analysis will be conducted in accordance with the PRISMA guideline. Details of this  
15 study will be submitted to open access. The results will be published in a peer-reviewed journal and disseminated at  
16 relevant conferences.  
17

18  
19 **Contributions** SS Lin, JY Mao, and XL Wang conceived and designed the study together. SS Lin, QY Shi, and FW  
20 Yang developed the search strategy together. SS Lin drafted the protocol manuscript. All the authors have reviewed and  
21 approved the final manuscript.  
22

23  
24 **Funding** This work was supported by the "Innovation team development Plan" of the Ministry of Education-Research  
25 on the prevention and treatment of cardiovascular diseases in traditional Chinese medicine (grant number: IRT16R54).  
26

27 **Competing interests** None.  
28

## 29 REFERENCES

- 30 1. Chinese Society of Cardiology. Guidelines for diagnosis and treatment of heart failure in China 2018. Chinese Journal  
31 of Cardiology 2018;46:760. <https://www.chinahfc.org/statics/default/myfront/zn.pdf>
- 32 2. Ponikowski P, Voors AA, Anker SD, et al. 2016 ESC Guidelines for the diagnosis and treatment of acute and chronic  
33 heart failure. Eur Heart J 2016;37:2129-200. DOI: [10.1093/eurheartj/ehw128](https://doi.org/10.1093/eurheartj/ehw128)
- 34 3. Benjamin EJ, Muntner P, Alonso A, et al. Heart disease and stroke statistics-2019 update: a report from the American  
35 heart association. Circulation 2019;139:e56-e528. DOI: [10.1161/CIR.0000000000000659](https://doi.org/10.1161/CIR.0000000000000659)
- 36 4. Cook C, Cole G, Asaria P, Jabbour R, Francis DP. The annual global economic burden of heart failure. Int J Cardiol  
37 2014;171:368-76. DOI: [10.1016/j.ijcard.2013.12.028](https://doi.org/10.1016/j.ijcard.2013.12.028)
- 38 5. Lu Y, Wang AY, Wei ZH, Yu SY, Zhang WW. Exploring the thinking and methods of Chinese medicine based on  
39 "holistic view". World Science and Technology/Modernization of Traditional Chinese Medicine and Materia  
40 Medica 2019;21:1-7.  
41 <https://kns.cnki.net/KCMS/detail/detail.aspx?dbcode=CJFQ&dbname=CJFDLAST2019&filename=SJKX201901003&v=MDM4NjZZUzdEaDFUM3FUclndNMUZyQ1VSN3FmWnVSbkZDdmhXN3pQTmlmQWRyRzRIOWpNcm85Rl0UjhlWDFMdXg=>
- 42 6. Yu SY, Lu Y. Discussion on action mechanisms of traditional Chinese medicine. Chinese Journal of Pharmacology  
43 and Toxicology 2018;32:347-54.  
44 <https://kns.cnki.net/KCMS/detail/detail.aspx?dbcode=CJFQ&dbname=CJFDLAST2018&filename=YLBS201805001&v=MzEwOTJxbzJGWIISOGVYMUxleFITN0RoMVQzcVRyV00xRnJDVVI3cWZadVJuRkN2aFc3dk1QQ0hKZmJHNEg5bk0=>
- 45 7. Bian J, Li Z. Theory and clinical research progress of dual-direction regulation. Chinese Journal of Urban and Rural  
46

- 1 Industrial Hygiene 2016;31:49-51.  
2 <https://kns.cnki.net/KCMS/detail/detail.aspx?dbcode=CJFQ&dbname=CJFDLAST2016&filename=ZCXW201609018&v=MTYxMzRya1VyeklQeTdUZWJHNEg5Zk1wbzlfYkISOGVYMUxleFITN0RoMVQzcvRyV00xRnJDVVI3cWZadVJuRkM=>  
3  
4  
5  
6
- 7 8. Ge MX, Feng YL, Zhang XX, Lv L, He HT. Meta-analysis of Salvia Miltiorrhiza Ligustrazine Injection combined  
8 with conventional medication in treatment of chronic heart failure. Drug Evaluation Research 2019;42:2084-91.  
9 <https://kns.cnki.net/KCMS/detail/detail.aspx?dbcode=CJFQ&dbname=CJFDLAST2019&filename=YWPJ201910034&v=MjgwMDNVUjdxZlp1Um5GQ3JrVTevTFBEcmJaTEc0SDlqTnI0OUdZSVI4ZVgxTHV4WVM3RGgxVDNxVHJXTTFGckM=>  
10  
11  
12  
13
- 14 9. Ou YW, Dong YJ, Zhu YL. Meta-analysis on Sofren Injection in treatment of heart failure. Shanghai Journal of  
15 Traditional Chinese Medicine 2019;53:37-43.  
16 <https://kns.cnki.net/KCMS/detail/detail.aspx?dbcode=CJFQ&dbname=CJFDLAST2019&filename=SHZZ201907015&v=MDAwNDFyQ1VSN3FmWnVSbkZDcmtVNzNNTmlYUmRMRzRIOWpNcUk5RVIZUjhlWDFMdxhZUzdEaDFUM3FUcldNMUY=>  
17  
18  
19  
20
- 21 10. Xie N, Dai XH. Meta analysis on curative effects of Yiqi Fumai Injection (Lyophilization) for heart failure. Chinese  
22 Journal of Integrative Medicine on Cardio-/Cerebrovascular Disease 2019;17:1499-503.  
23 <https://kns.cnki.net/KCMS/detail/detail.aspx?dbcode=CJFQ&dbname=CJFDLAST2019&filename=ZYYY201910016&v=MDkwMTFOcjQ5RVlvUjhlWDFMdxhZUzdEaDFUM3FUcldNMUZyQ1VSN3FmWnVSbkZDcmtWYnJQUHpUU2Q3RzRIOWo=>  
24  
25  
26  
27
- 28 11. Lin WJ, Li SS, Han JD, Qin YB, Wang LJ, Xian SX. The hemodynamic effects of Huangqi Injection in the  
29 treatment of chronic heart failure: a meta-analysis of clinical controlled trials. Research and Practice on Chinese  
30 Medicines 2019;33:63-8.  
31 <https://kns.cnki.net/KCMS/detail/detail.aspx?dbcode=CJFQ&dbname=CJFDLAST2019&filename=JZZY201901016&v=MTg2NDI1Um5GQ3JtVTd2Skx6ZlJkN0c0SDlqTXJvOUVZb1I4ZVgxTHV4WVM3RGgxVDNxVHJXTTFGckNVUjdxZlo=>  
32  
33  
34  
35  
36
- 37 12. Zhu YH, Shen XX, Han QQ, Zhao J. A meta-analysis of Shenfu Injection in myocardial infarction with heart  
38 failure. Chinese Journal of Evidence-Based Cardiovascular Medicine 2018;10:402-406.  
39 <https://kns.cnki.net/KCMS/detail/detail.aspx?dbcode=CJFQ&dbname=CJFDLAST2018&filename=PZXX201804005&v=MTg0NjdmWnVSbkZDcm1WTHpOTIRmVGRyRzRIOW5NcTQ5RlIzUjhlWDFMdxhZUzdEaDFUM3FUcldNMUZyQ1VSN3E=>  
40  
41  
42  
43  
44
- 45 13. Xu T, Shi XQ, Wang F, Liu RX. Effectiveness and safety of Shenmai injection in the treatment of heart failure.  
46 Journal of Community Medical 2018;16:53-56.  
47 <https://kns.cnki.net/KCMS/detail/detail.aspx?dbcode=CJFQ&dbname=CJFDLAST2018&filename=SQYX201807022&v=MDYzMzRxVHJXTTFGckNVUjdxZlp1Um5GQ3JtV3JyTk5qelNkckc0SDluTXFJOUhab1I4ZVgxTHV4WVM3RGgxVDM=>  
48  
49  
50  
51
- 52 14. Wang KH, Wu JR, Duan XJ, Zhang D, Zhang XM, Zhang B. Meta-analysis on randomized controlled trials  
53 of Shenqi Fuzheng Injection in the treatment of chronic heart failure . Chinese Journal of Pharmacoepidemiology  
54 2018;27:27-32.  
55 <https://kns.cnki.net/KCMS/detail/detail.aspx?dbcode=CJFQ&dbname=CJFDLAST2018&filename=YWLX201801008&v=MjAzMDBlWDFMdxhZUzdEaDFUM3FUcldNMUZyQ1VSN3FmWnVSbkZDcm5VTHJPUERYSGRyRzRIOW5Ncm85RmJJUjg=>  
56  
57  
58  
59
- 60 15. Lu XH, Zhang L, Wang JB, et al. Clinical efficacy and safety of xinmailong injection for the treatment of chronic  
heart failure: A meta-analysis. Front Pharmacol 2018;9:810. DOI: 10.3389/fphar.2018.00810

16. Wang K, Wu J, Duan X, et al. Huangqi injection in the treatment of chronic heart failure: A systematic review and meta-analysis. *Medicine (Baltimore)* 2017;96:e8167. [DOI: 10.1097/MD.00000000000008167](https://doi.org/10.1097/MD.00000000000008167)
17. Bai D, Yue GX, Wang RH, Miao Q, Xu J, Liu LM. Clinical characteristics of five traditional Chinese medicine injections in treating heart failure based on Meta-analysis literature. *Zhongguo Zhong Yao Za Zhi* 2018;43:4152-62. [DOI: 10.19540/j.cnki.cjcm.20180709.002](https://doi.org/10.19540/j.cnki.cjcm.20180709.002)
18. Yang FW, Zou JH, Wang Y, et al. Network meta-analysis of Chinese medical injections for heart failure. *Zhongguo Zhong Yao Za Zhi* 2018;43:1247-53. [DOI: 10.19540/j.cnki.cjcm.2018.0049](https://doi.org/10.19540/j.cnki.cjcm.2018.0049)
19. Wang KH, Wu JR, Zhang D, Duan XJ, Ni MW. Comparative efficacy of Chinese herbal injections for treating chronic heart failure: a network meta-analysis. *BMC Complement Altern Med* 2018;18:41. [DOI: 10.1186/s12906-018-2090-3](https://doi.org/10.1186/s12906-018-2090-3)
20. Jonas DE, Wilkins TM, Bangdiwala S, et al. Findings of Bayesian mixed treatment comparison meta-analyses: comparison and exploration using real-world trial data and simulation. Rockville (MD): Agency for Healthcare Research and Quality (US) 2013; Report No.: 13-EHC039-EF. [https://pubmed.ncbi.nlm.nih.gov/23469378-findings-of-bayesian-mixed-treatment-comparison-meta-analyses-comparison-and-exploration-using-real-world-trial-data-and-simulation-internet/?from\\_single\\_result=Findings+of+Bayesian+Mixed+Treatment+Comparison+Meta-Analyses%3A+Comparison+and+Exploration+Using+Real-World+Trial+Data+and+Simulation](https://pubmed.ncbi.nlm.nih.gov/23469378-findings-of-bayesian-mixed-treatment-comparison-meta-analyses-comparison-and-exploration-using-real-world-trial-data-and-simulation-internet/?from_single_result=Findings+of+Bayesian+Mixed+Treatment+Comparison+Meta-Analyses%3A+Comparison+and+Exploration+Using+Real-World+Trial+Data+and+Simulation)
21. Jansen JP, Crawford B, Bergman G, Stam W. Bayesian meta-analysis of multiple treatment comparisons: an introduction to mixed treatment comparisons. *Value in health: the journal of the International Society for Pharmacoeconomics and Outcomes Research* 2008;11:956-64. [DOI: 10.1111/j.1524-4733.2008.00347.x](https://doi.org/10.1111/j.1524-4733.2008.00347.x)
22. Higgins J and Thomas J (senior editors). *Cochrane Handbook for Systematic Reviews of Interventions* Version 6. updated 2019. <https://training.cochrane.org/handbook/current>
23. Moher D, Liberati A, Tetzlaff J, Altman DG, PRISMA Group. Preferred reporting items for systematic reviews and meta-analyses: the PRISMA statement. *Plos Med* 2009;6:e1000097. [DOI: 10.1371/journal.pmed.1000097](https://doi.org/10.1371/journal.pmed.1000097)
24. Higgins JPT, Altman DG, Gøtzsche PC, et al. The Cochrane Collaboration's tool for assessing risk of bias in randomised trials. *BMJ (Clinical research ed.)* 2011;343:d5928. [DOI: 10.1136/bmj.d5928](https://doi.org/10.1136/bmj.d5928)
25. Brooks SP, Gelman A. General methods for monitoring convergence of iterative simulations. *J Comput Graph Stat* 1998;7:434-455. <http://www2.stat.duke.edu/~scs/Courses/Stat376/Papers/ConvergeDiagnostics/BrooksGelman.pdf>
26. Dias S, Sutton AJ, Ades AE, Welton NJ. Evidence synthesis for decision making 2: a generalized linear modeling framework for pairwise and network meta-analysis of randomized controlled trials. *Med Decis Making* 2013;33:607-17. [DOI: 10.1177/0272989X12458724](https://doi.org/10.1177/0272989X12458724)
27. Rucker G, Schwarzer G. Ranking treatments in frequentist network meta-analysis works without resampling methods. *BMC Med Res Methodol* 2015;15:58. [DOI: 10.1186/s12874-015-0060-8](https://doi.org/10.1186/s12874-015-0060-8)
28. Zheng H, Chen Q, Chen M, et al. Nonpharmacological conservative treatments for chronic functional constipation: A systematic review and network meta-analysis. *Neurogastroenterol Motil* 2019;31:e13441. [DOI: 10.1111/nmo.13441](https://doi.org/10.1111/nmo.13441)
29. Balshem H, Helfand M, Schünemann HJ, et al. GRADE guidelines: 3. Rating the quality of evidence. *J Clin Epidemiol* 2011;64:401-6. [DOI: 10.1016/j.jclinepi.2010.07.015](https://doi.org/10.1016/j.jclinepi.2010.07.015)
30. Puhan MA, Schünemann HJ, Murad MH, et al. A GRADE Working Group approach for rating the quality of treatment effect estimates from network meta-analysis. *BMJ (Clinical research ed.)* 2014;349:g5630. [DOI: 10.1136/bmj.g5630](https://doi.org/10.1136/bmj.g5630)

1 [10.1136/bmj.g5630](https://doi.org/10.1136/bmj.g5630)

- 2
- 3 31. Brignardello-Petersen R, Bonner A, Alexander PE, et al. Advances in the GRADE approach to rate the certainty in  
4 estimates from a network meta-analysis. J Clin Epidemiol 2018;93:36-44. DOI: [10.1016/j.jclinepi.2017.10.005](https://doi.org/10.1016/j.jclinepi.2017.10.005)
- 5
- 6 32. Guyatt GH, Oxman AD, Schünemann HJ, Tugwell P, Knottnerus A. GRADE guidelines: a new series of articles in  
7 the Journal of Clinical Epidemiology. J Clin Epidemiol 2011;64:380-2. DOI: [10.1016/j.jclinepi.2010.09.011](https://doi.org/10.1016/j.jclinepi.2010.09.011)
- 8
- 9 33. Guyatt GH, Oxman AD, Vist GE, et al. GRADE: an emerging consensus on rating quality of evidence and strength  
10 of recommendations. BMJ (Clinical research ed.) 2008;336:924-6. DOI: [10.1136/bmj.39489.470347.AD](https://doi.org/10.1136/bmj.39489.470347.AD)
- 11
- 12
- 13
- 14
- 15
- 16
- 17
- 18
- 19
- 20
- 21
- 22
- 23
- 24
- 25
- 26
- 27
- 28
- 29
- 30
- 31
- 32
- 33
- 34
- 35
- 36
- 37
- 38
- 39
- 40
- 41
- 42
- 43
- 44
- 45
- 46
- 47
- 48
- 49
- 50
- 51
- 52
- 53
- 54
- 55
- 56
- 57
- 58
- 59
- 60

For peer review only



## Annex 1 Search Strategy in PubMed

| Search | Query                                                                    | Items found |
|--------|--------------------------------------------------------------------------|-------------|
| #1     | Heart Failure[MeSH Terms]                                                |             |
| #2     | heart failure[Title/Abstract]                                            |             |
| #3     | cardiac failure[Title/Abstract]                                          |             |
| #4     | heart decompensation[Title/Abstract]                                     |             |
| #5     | heart dysfunction[Title/Abstract]                                        |             |
| #6     | cardiac dysfunction[Title/Abstract]                                      |             |
| #7     | ventricular dysfunction[Title/Abstract]                                  |             |
| #8     | heart dificiency[Title/Abstract]                                         |             |
| #9     | cardiac dificiency[Title/Abstract]                                       |             |
| #10    | heart insufficiency[Title/Abstract]                                      |             |
| #11    | cardiac insufficiency[Title/Abstract]                                    |             |
| #12    | #1 OR #2 OR #3 OR #4 OR #5 OR #6 OR #7 OR #8 OR #9 OR #10 OR #11         |             |
| #13    | Medicine, Chinese Traditional[Mesh]                                      |             |
| #14    | traditional Chinese medicine[All Fields]                                 |             |
| #15    | Chinese traditional medicine[All Fields]                                 |             |
| #16    | Chinese medicine[All Fields]                                             |             |
| #17    | Drugs, Chinese Herbal[Mesh]                                              |             |
| #18    | Chinese herbal drug\$[All Fields]                                        |             |
| #19    | Chinese herbal medicine[All Fields]                                      |             |
| #20    | Chinese patent drug\$[All Fields]                                        |             |
| #21    | Chinese patent medicine[All Fields]                                      |             |
| #22    | Chinese proprietary drug[All Fields]                                     |             |
| #23    | Chinese proprietary medicine[All Fields]                                 |             |
| #24    | Chinese crude drug\$[All Fields]                                         |             |
| #25    | Chinese materia medica[All Fields]                                       |             |
| #26    | traditional Chinese medicine patent prescription\$[All Fields]           |             |
| #27    | traditional Chinese patent medicines and simple preparations[All Fields] |             |

|    |     |                                                                           |
|----|-----|---------------------------------------------------------------------------|
| 1  | #28 | traditional Chinese medicine injection\$[All Fields]                      |
| 2  |     |                                                                           |
| 3  | #29 | Chinese medicine injection\$[All Fields]                                  |
| 4  |     |                                                                           |
| 5  | #30 | Complementary Therapies[MeSH]                                             |
| 6  |     |                                                                           |
| 7  | #31 | #13 OR #14 OR #15 OR #16 OR #17 OR #18 OR #19 OR #20 OR #21 OR #22 OR #23 |
| 8  |     | OR #24 OR #25 OR #26 OR #27 OR #28 OR #29 OR #30                          |
| 9  |     |                                                                           |
| 10 | #32 | Injections[MeSH]                                                          |
| 11 |     |                                                                           |
| 12 | #33 | injection\$[Title/Abstract]                                               |
| 13 |     |                                                                           |
| 14 | #34 | injectable\$[Title/Abstract]                                              |
| 15 |     |                                                                           |
| 16 | #35 | #32 OR #33 OR #34                                                         |
| 17 |     |                                                                           |
| 18 | #36 | Randomized Controlled Trials as Topic[Mesh]                               |
| 19 |     |                                                                           |
| 20 | #37 | Randomized Controlled Trial[Publication Type]                             |
| 21 |     |                                                                           |
| 22 | #38 | Controlled Clinical Trial[Publication Type]                               |
| 23 |     |                                                                           |
| 24 | #39 | Equivalence Trial[Publication Type]                                       |
| 25 |     |                                                                           |
| 26 | #40 | randomized controlled trial[Title/Abstract]                               |
| 27 |     |                                                                           |
| 28 | #41 | Random Allocation[Mesh]                                                   |
| 29 |     |                                                                           |
| 30 | #42 | Double-Blind Method[Mesh]                                                 |
| 31 |     |                                                                           |
| 32 | #43 | Single-Blind Method[Mesh]                                                 |
| 33 |     |                                                                           |
| 34 | #44 | Clinical Trial[Publication Type]                                          |
| 35 |     |                                                                           |
| 36 | #45 | Research Design[Mesh]                                                     |
| 37 |     |                                                                           |
| 38 | #46 | Placebos[Mesh]                                                            |
| 39 |     |                                                                           |
| 40 | #47 | placebo\$[Title/Abstract]                                                 |
| 41 |     |                                                                           |
| 42 | #48 | random*\$[Title/Abstract]                                                 |
| 43 |     |                                                                           |
| 44 | #49 | trial\$[Title]                                                            |
| 45 |     |                                                                           |
| 46 | #50 | #36 OR #37 OR #38 OR #39 OR #40 OR #41 OR #42 OR #43 OR #44 OR #45 OR #46 |
| 47 |     | OR #47 OR #48 OR #49                                                      |
| 48 |     |                                                                           |
| 49 | #51 | Systemic Review[Publication Type]                                         |
| 50 |     |                                                                           |
| 51 | #52 | systemic review[Title/Abstract]                                           |
| 52 |     |                                                                           |
| 53 | #53 | systemic literature review[Title/Abstract]                                |
| 54 |     |                                                                           |
| 55 | #54 | Meta Analysis[Publication Type]                                           |
| 56 |     |                                                                           |
| 57 | #55 | Meta analysis[Title/Abstract]                                             |
| 58 |     |                                                                           |
| 59 |     |                                                                           |
| 60 |     |                                                                           |



|    |     |                                                                           |
|----|-----|---------------------------------------------------------------------------|
| 1  | #56 | Meta-analysis[Publication Type]                                           |
| 2  |     |                                                                           |
| 3  | #57 | Meta-analysis[Title/Abstract]                                             |
| 4  |     |                                                                           |
| 5  | #58 | pooled analysis[Title/Abstract]                                           |
| 6  |     |                                                                           |
| 7  | #59 | Consensus Development Conference as Topic[Mesh]                           |
| 8  |     |                                                                           |
| 9  | #60 | Consensus Development Conference[Publication Type]                        |
| 10 |     |                                                                           |
| 11 | #61 | consensus development conference[Title/Abstract]                          |
| 12 |     |                                                                           |
| 13 | #62 | expert consensus[Title/Abstract]                                          |
| 14 |     |                                                                           |
| 15 | #63 | Practice Guideline as Topic[Mesh]                                         |
| 16 |     |                                                                           |
| 17 | #64 | Practice Guideline[Publication Type]                                      |
| 18 |     |                                                                           |
| 19 | #65 | practice guideline[Title/Abstract]                                        |
| 20 |     |                                                                           |
| 21 | #66 | Cochrane database systemic review[Title/Abstract]                         |
| 22 |     |                                                                           |
| 23 | #67 | Evidence-based Medicine[Mesh]                                             |
| 24 |     |                                                                           |
| 25 | #68 | evidence-based medicine[Title/Abstract]                                   |
| 26 |     |                                                                           |
| 27 | #69 | best practice[Title/Abstract]                                             |
| 28 |     |                                                                           |
| 29 | #70 | evidence synthesis[Title/Abstract]                                        |
| 30 |     |                                                                           |
| 31 | #71 | synthesis analysis[Title/Abstract]                                        |
| 32 |     |                                                                           |
| 33 |     |                                                                           |
| 34 |     |                                                                           |
| 35 | #72 | #51 OR #52 OR #53 OR #54 OR #55 OR #56 OR #57 OR #58 OR #59 OR #60 OR #61 |
| 36 |     | OR #62 OR #63 OR #64 OR #65 OR #66 OR #67 OR #68 OR #69 OR #70 OR #71     |
| 37 |     |                                                                           |
| 38 | #73 | #12 AND #31 AND #35 AND #50 AND #72                                       |
| 39 |     |                                                                           |
| 40 |     |                                                                           |
| 41 |     |                                                                           |
| 42 |     |                                                                           |
| 43 |     |                                                                           |
| 44 |     |                                                                           |
| 45 |     |                                                                           |
| 46 |     |                                                                           |
| 47 |     |                                                                           |
| 48 |     |                                                                           |
| 49 |     |                                                                           |
| 50 |     |                                                                           |
| 51 |     |                                                                           |
| 52 |     |                                                                           |
| 53 |     |                                                                           |
| 54 |     |                                                                           |
| 55 |     |                                                                           |
| 56 |     |                                                                           |
| 57 |     |                                                                           |
| 58 |     |                                                                           |
| 59 |     |                                                                           |
| 60 |     |                                                                           |

# BMJ Open

## Traditional Chinese medicine injections for heart failure: a protocol for systematic review and network meta-analysis of randomized controlled trials

|                                 |                                                                                                                                                                                                                                                                                                                                                                                                                                                                      |
|---------------------------------|----------------------------------------------------------------------------------------------------------------------------------------------------------------------------------------------------------------------------------------------------------------------------------------------------------------------------------------------------------------------------------------------------------------------------------------------------------------------|
| Journal:                        | <i>BMJ Open</i>                                                                                                                                                                                                                                                                                                                                                                                                                                                      |
| Manuscript ID                   | bmjopen-2020-037331.R1                                                                                                                                                                                                                                                                                                                                                                                                                                               |
| Article Type:                   | Protocol                                                                                                                                                                                                                                                                                                                                                                                                                                                             |
| Date Submitted by the Author:   | 15-Apr-2020                                                                                                                                                                                                                                                                                                                                                                                                                                                          |
| Complete List of Authors:       | Lin, Shan-Shan; First Teaching Hospital of Tianjin University of Traditional Chinese Medicine, Cardiovascular Department<br>Shi, Qingyang; Tianjin University of Traditional Chinese Medicine, Graduate school<br>Yang, Fengwen; Tianjin University of Traditional Chinese Medicine, Evidence based Medicine Center<br>Wang, Xianliang<br>Mao, Jingyuan; The First Teaching Hospital of Tianjin University of Traditional Chinese Medicine, Cardiovascular Departmen |
| <b>Primary Subject Heading</b>: | Cardiovascular medicine                                                                                                                                                                                                                                                                                                                                                                                                                                              |
| Secondary Subject Heading:      | Complementary medicine, Cardiovascular medicine, Evidence based practice                                                                                                                                                                                                                                                                                                                                                                                             |
| Keywords:                       | Heart failure < CARDIOLOGY, COMPLEMENTARY MEDICINE, Clinical trials < THERAPEUTICS, Herbal medicine < THERAPEUTICS, Adverse events < THERAPEUTICS                                                                                                                                                                                                                                                                                                                    |
|                                 |                                                                                                                                                                                                                                                                                                                                                                                                                                                                      |

SCHOLARONE™  
Manuscripts



I, the Submitting Author has the right to grant and does grant on behalf of all authors of the Work (as defined in the below author licence), an exclusive licence and/or a non-exclusive licence for contributions from authors who are: i) UK Crown employees; ii) where BMJ has agreed a CC-BY licence shall apply, and/or iii) in accordance with the terms applicable for US Federal Government officers or employees acting as part of their official duties; on a worldwide, perpetual, irrevocable, royalty-free basis to BMJ Publishing Group Ltd ("BMJ") its licensees and where the relevant Journal is co-owned by BMJ to the co-owners of the Journal, to publish the Work in this journal and any other BMJ products and to exploit all rights, as set out in our [licence](#).

The Submitting Author accepts and understands that any supply made under these terms is made by BMJ to the Submitting Author unless you are acting as an employee on behalf of your employer or a postgraduate student of an affiliated institution which is paying any applicable article publishing charge ("APC") for Open Access articles. Where the Submitting Author wishes to make the Work available on an Open Access basis (and intends to pay the relevant APC), the terms of reuse of such Open Access shall be governed by a Creative Commons licence – details of these licences and which [Creative Commons](#) licence will apply to this Work are set out in our licence referred to above.

Other than as permitted in any relevant BMJ Author's Self Archiving Policies, I confirm this Work has not been accepted for publication elsewhere, is not being considered for publication elsewhere and does not duplicate material already published. I confirm all authors consent to publication of this Work and authorise the granting of this licence.

1  
2  
3  
4  
5  
6  
7  
8  
9  
10  
11  
12  
13  
14  
15  
16  
17  
18  
19  
20  
21  
22  
23  
24  
25  
26  
27  
28  
29  
30  
31  
32  
33  
34  
35  
36  
37  
38  
39  
40  
41  
42  
43  
44  
45  
46  
47  
48  
49  
50  
51  
52  
53  
54  
55  
56  
57  
58  
59  
60

# **Traditional Chinese medicine injections for heart failure: a protocol for systematic review and network meta-analysis of randomized controlled trials**

Shan-Shan Lin,<sup>1</sup> Qing-Yang Shi,<sup>2</sup> Feng-Wen Yang,<sup>3</sup> Xian-Liang Wang,<sup>1,\*</sup> and Jing-Yuan Mao<sup>1,\*</sup>

<sup>1</sup> Cardiovascular Department, First Teaching Hospital of Tianjin University of Traditional Chinese Medicine, Tianjin 300381, China

<sup>2</sup> Tianjin University of Traditional Chinese Medicine, Tianjin301617, China

<sup>3</sup> Evidence-Based Medicine Center, Tianjin University of Traditional Chinese Medicine, Tianjin301617, China

\* Corresponding author: Xian-Liang Wang and Jing-Yuan Mao.

Xian-Liang Wang, Cardiovascular Department, First Teaching Hospital of Tianjin University of Traditional Chinese Medicine, 88 Changling Road, Xiqing District, Tianjin 300381, China (e-mail: xliwang1981@126.com; telephone number: 0086(22)27986333)

Jing-Yuan Mao, Cardiovascular Department, First Teaching Hospital of Tianjin University of Traditional Chinese Medicine, 88 Changling Road, Xiqing District, Tianjin 300381, China (e-mail: jymao@126.com; telephone number: 0086(22)27986000)

## ABSTRACT

**Introduction:** Heart failure (HF) has always been an important issue in global public health. The research and development of traditional Chinese medicine (TCM) provide more possibilities for improving the prognosis of HF patients. Because multiple traditional Chinese medicine injections (TCMIs) are being widely applied in clinical work, it is important to choose the right TCMIs for HF patients. The purpose of this study is to assess and compare the effect of different TCMIs for HF using network meta-analysis (NMA) and further provide references for clinical decision-making.

**Methods and analysis:** The clinical randomized controlled trials (RCTs) and meta-analyses of TCMIs for treating HF will be searched in the relevant database, including PubMed, EMBASE, Cochrane Library (No.2 of 2020), Chinese BioMedical Literature Database (CBM), China National Knowledge Infrastructure (CNKI), Wan Fang database and VIP database from inception to February 29, 2020. The outcomes of interest include all-cause mortality, rehospitalization rate, left ventricular ejection fraction (LVEF), left ventricular end-diastolic diameter (LVEDD), left ventricular end-systolic diameter (LVESD), brain natriuretic peptide (BNP), N-terminal pro-brain natriuretic peptide (NT-proBNP), cardiac output (CO), stroke volume (SV), 6 minutes walking distance, and adverse events. The risk of bias assessment of the included RCTs will be conducted according to the Cochrane Collaboration's tool for assessing the risk of bias. NMA will be performed in a Bayesian hierarchical framework using R (version 3.6.1) with the *gemtc* package. Finally, we will rank the efficacy of these treatment programs according to the surface under the cumulative ranking curve (SUCRA), and perform quality assessment and recommendation grading of the evidence according to the Grading of Recommendations Assessment, Development and Evaluation (GRADE) system.

**Ethics and dissemination:** This study will extract data from published literature and not involve private information from individuals or compromise their rights. Therefore, the study does not require ethical approval. The results will eventually be published in a peer-reviewed journal and disseminated at relevant conferences.

### Strengths and limitations of this study

- Compared with traditional pairwise meta-analysis, NMA can comprehensively analyze direct and indirect comparison results of different TCMIs for HF to obtain more reliable conclusions.
- Compared with traditional pairwise meta-analysis, NMA can compare and rank the efficacy of different TCMIs for HF.
- This study can provide more comprehensive suggestions and references for clinical decision-making and guideline development.
- This study did not further explore the efficacy of drugs based on different TCM syndrome types.
- This study did not explore the economic benefits of these drugs, and further exploration can be done based on the results of this study.

## INTRODUCTION

Heart failure (HF) is a complex set of clinical syndromes caused by abnormal changes in the structure and/or function of the heart that impair ventricular contraction and/or diastolic function.<sup>1</sup> HF is a severe end-stage of heart disease. Due to the high mortality rate, HF has become an important issue in global public health.<sup>2</sup> According to the 2016 European Society of Cardiology Guidelines for the diagnosis and treatment of acute and chronic heart failure, current treatment options for HF are diverse, generally including cardiotonic, diuretic, vasodilator, angiotensin-converting enzyme inhibitor (ACEI), angiotensin receptor blocker (ARB),  $\beta$ -blocker, and so on. Modern medicine has made great progress in the field of HF, but the prognosis of HF patients is still not satisfactory, resulting in a heavy global burden.<sup>3, 4</sup> The development of new therapeutic drugs is an inevitable trend of future medical development. The research and development of traditional

Chinese medicine (TCM) provide more possibilities for improving the prognosis of HF patients. TCM has the advantages of multi-target effect and bidirectional regulation, so there has been increasing attention in the global medical field.<sup>5-7</sup> With the development of modernization of TCM, more and more traditional Chinese medicine injections (TCMIs) for the treatment of HF have been developed and widely used in clinical practice. Many studies have shown that loading TCMIs based on conventional pharmacotherapy (CPT) can effectively improve the clinical symptoms and reduce the incidence of cardiovascular events and adverse reactions in HF patients.<sup>8-17</sup> However, due to the lack of direct comparison studies between TCMIs, the comparative results between TCMIs are unclear. Therefore, although the increasing variety of drugs has provided doctors and patients with more choices, meanwhile it is also a new challenge to choose the best treatment scheme at the same time.

Meta-analysis is one of the highest levels of evidence in evidence-based research. However, it is difficult to compare the effects of multiple drugs at the same time by traditional pairwise meta-analysis. Network meta-analysis (NMA) is a further development based on the traditional pairwise meta-analysis. Based on the current clinical research data, NMA can complete direct and indirect comparisons among different TCMIs at the same time, and further comprehensively analyze the results of the direct and indirect comparison, to obtain the efficacy ranking of multiple drugs. At present, some researchers have performed the NMA on randomized controlled trials (RCTs) of TCMIs for HF.<sup>18, 19</sup> However, there are some shortcomings in the published literature: ①The types of TCMIs included are not comprehensive. Only a few commonly used drugs have been studied, which severely limits the development and utilization of other potentially effective drugs. ②Results of the most important clinical outcomes have not been reported, such as all-cause mortality and rehospitalization rate. ③The research data has not been updated in the past two years. Therefore, we conceived and designed this study to make up for the above shortcomings. We will comprehensively retrieve relevant data to assess and compare the effectiveness and safety of different TCMIs for the treatment of HF using NMA. The results of this study will provide more updated comprehensive evidence for clinical decision-making.

## OBJECTIVES

We will systematically search all clinical RCTs on TCMIs for HF and perform a Bayesian network meta-analysis.<sup>20, 21</sup> The purpose is to explore the efficacy and safety of TCMIs in the treatment of HF, and to rank the clinical efficacy of drugs.

## METHODS AND ANALYSIS

### Patient and public involvement

No patient involved.

### Inclusion and exclusion criteria for clinical RCTs

#### *Type of participants*

The included studies must indicate that participants meet the diagnostic criteria for HF in the “Guidelines for diagnosis and treatment of heart failure in China 2018” or “2016 ESC Guidelines for the diagnosis and treatment of acute and chronic heart failure”.<sup>1, 2</sup> Primary diseases include coronary heart disease, hypertension, dilated cardiomyopathy, and rheumatic heart disease. There are no restrictions on gender, age, race, duration of disease, source of the case, and follow-up time.

#### *Type of interventions and comparisons*

The following forms of intervention will be included: conventional pharmacotherapy (CPT) + TCMI versus CPT alone, CPT + TCMI versus CPT + placebo, CPT + TCMI A versus CPT + TCMI B. CPTs include cardiotonic, diuretic, vasodilator, angiotensin-converting enzyme inhibitor (ACEI), angiotensin receptor blocker (ARB),  $\beta$ -blocker, and so on.

1 And CPTs in the two groups should be the same. TCMIs must have been included in *the Pharmacopoeia of the People's*  
2 *Republic of China* or approved by *the China Food and Drug Administration*. All retrieved eligible TCMIs may be included  
3 in the study, but TCMIs without literature support will not be compared and ranked.  
4

## 5 **Outcomes**

6 Only studies using at least one of the following outcomes may be included.  
7

### 8 ▶Primary outcomes

- 9 ①All-cause mortality during different follow-up periods - e.g. 3 months; 6 months; 1 year or other periods
- 10 ②Rehospitalization rate during different follow-up periods - e.g. 3 months; 6 months; 1 year or other periods

### 11 ▶Secondary outcomes

- 12 ①Left ventricular ejection fraction (LVEF)
- 13 ②Left ventricular end-diastolic diameter (LVEDD)
- 14 ③Left ventricular end-systolic diameter (LVESD)
- 15 ④Brain natriuretic peptide (BNP)
- 16 ⑤N-terminal pro-brain natriuretic peptide (NT-proBNP)
- 17 ⑥Cardiac output (CO)
- 18 ⑦Stroke volume (SV)
- 19 ⑧6-minute walking test (6MWT)

### 20 ▶Adverse events

21 The adverse events that occurred during the study period include allergic reactions, bleeding events, gastrointestinal  
22 discomfort, liver and kidney damage, and others.  
23

## 24 **Type of study**

25 Randomized controlled trials (RCTs) that investigated the effectiveness and safety of TCHI for HF will be included.  
26

## 27 **Exclusion criteria**

28 ▶Participants are any of the following: the primary disease is congenital heart disease, pulmonary heart disease,  
29 hypertrophic cardiomyopathy, restrictive cardiomyopathy, constrictive pericarditis, systemic invasive disease,  
30 hyperthyroid heart disease, alcoholic myocardium disease, perinatal cardiomyopathy, drug-induced cardiomyopathy,  
31 Keshan disease.

32 ▶Participants are any of the following: heart failure with malignant arrhythmias, malignant tumors, hypothyroidism, severe  
33 liver and kidney dysfunction, or severe infections.

34 ▶Studies on the mixed efficacy of TCHIs combined with other TCM treatments will be excluded. For example,  
35 interventions have combined TCM decoctions, oral Chinese patent medicines, acupuncture, etc.

36 ▶None of the outcome indicators for this study.  
37

- ▶The full text cannot be obtained after seeking help online or contacting the corresponding author via email.
- ▶The data are incomplete or incorrect, and the data cannot be used for synthesis.
- ▶Studies with imbalanced or incomparable baseline data between the two groups.
- ▶For duplicate literature, choose the one published earlier.
- ▶Unfinished protocol.

## **Methods of obtaining data and analyzing data**

### ***Search strategy***

The clinical RCTs and meta-analyses of TCMI for treating HF will be searched in the relevant database, including PubMed, EMBASE, Cochrane Library (No.2 of 2020), Chinese BioMedical Literature Database (CBM), China National Knowledge Infrastructure (CNKI), Wan Fang database and VIP database without language restriction. The retrieval time is from inception to February 29, 2020. Search terms include heart failure, traditional Chinese medicine injection, names of TCMI that have been used in the clinic, randomized controlled trial, systemic review, meta-analysis, and their synonyms. The search strategy adopts a combination of Medical Subject Heading and free-text terms, and adopts different search strategies according to the characteristics of each database. The synonyms in the group are connected by “or”, and the search terms between the groups are connected by “and”. At the same time, we will also retrieve conference papers and dissertations, search and browse and review references of meta-analyses, conduct search engines such as Google Scholar to avoid omissions. The development of the search strategy has been completed by the researcher SS Lin with clinical work experience and the researcher QY Shi with evidence-based work experience, and has been modified according to the Cochrane Handbook for Systematic Reviews.<sup>22</sup> Take PubMed as an example. The detailed search strategy is shown in Annex 1.



## ***Literature screening***

Records from databases will be managed by NoteExpress (V3.2.0) software. First, we will import all retrieved records into NoteExpress and exclude duplicate records. Second, by reading the title and abstract of each record, we will exclude records that do not meet the inclusion and exclusion criteria. Finally, we will download and read the full texts of potentially relevant studies to perform the second screening. At the same time, the reasons for excluding records after reading the full text will be reported in detail. Literature screening will be done independently and cross-checked by two researchers (SS Lin and QY Shi). Disagreement will be determined through discussion between the two investigators. When consensus cannot be reached, a third investigator (FW Yang) will assist in the judgment. The literature screening based on PRISMA is shown in Figure 1.<sup>23</sup> In the early stage of the study, we will train the evaluators and conduct pre-tests to ensure a standardized screening process.

## ***Data extraction and management***

Data extraction will be performed independently by two investigators (SS Lin and QY Shi) and cross-checked. Disagreement will be determined through discussion between the two investigators. When consensus cannot be reached, a third investigator (FW Yang) will assist in the judgment. The preset information extraction items are shown in Table 1.

**Table 1 Information extraction items**

| <b>Categories</b>     | <b>Specific items</b>                                                                                                                                                             |
|-----------------------|-----------------------------------------------------------------------------------------------------------------------------------------------------------------------------------|
| Study characteristics | title, first author, journal name, publication year, and type of study                                                                                                            |
| Participants          | diagnostic criteria, sample size, gender, age, ethnicity, case source, and baseline status                                                                                        |
| Intervention          | drug name, medication route, drug dose, course of treatment, and patient compliance                                                                                               |
| Control               | drug name, medication route, drug dose, course of treatment, and patient compliance                                                                                               |
| Outcomes              | whether there is an intention-to-treat, loss to follow-up and withdrawal, outcomes                                                                                                |
| Risk of bias          | random sequence generation, allocation concealment, participant and personnel blinding, outcome assessment blinding, incomplete outcome data, selective reporting, and other bias |
| Others                | author's main conclusions, funding, and others                                                                                                                                    |

## ***Dealing with missing data***

When data is missing, we will contact the original authors for complete data. If the missing value of outcomes cannot be obtained from the original author, we will delete the comparison results related to the missing data and fully consider the risk of bias.

## ***Assessment of risk of bias***

According to the Cochrane Collaboration's tool for assessing the risk of bias in randomized trials,<sup>24</sup> we will assess the risk of bias in the included literature from the following seven items: ①random sequence generation; ②allocation concealment; ③participant and personnel blinding; ④outcome assessment blinding; ⑤incomplete outcome data;

⑥selective reporting; and ⑦other bias. The results of the risk of bias assessment include the low risk of bias, the high risk of bias, and the unclear risk of bias. This process will be done independently by two investigators (SS Lin and QY Shi) and cross-checked. Disagreement will be determined through discussion between the two investigators. When consensus cannot be reached, a third investigator (FW Yang) will assist in the judgment. When there is a difference in the risk of bias between studies, we will try to analyze the impact of risk of bias. The risk of bias graph and the risk of bias summary will be generated by RevMan 5.3.

## Data analysis

### *Pairwise meta-analysis and network meta-analysis*

A Bayesian approach will be used to conduct pairwise meta-analyses and network meta-analyses according to the Markov chain Monte Carlo (MCMC) method.<sup>21</sup> In a Bayesian hierarchical framework, we will assume the vague prior distribution parameters for the between-study heterogeneity with uniform distribution in advance. The convergence of the model will be assessed using the Brooks-Gelman-Rubin plot.<sup>25</sup> Dichotomous variables will be presented as the relative risk (RR) or odds ratio (OR) with a 95% credible interval (CrI). Continuous variables will be presented as the weight mean difference (WMD) with a 95% CrI. The  $\chi^2$  test and  $I^2$  test will be conducted to assess the potential heterogeneity.  $P < 0.05$  is considered statistically significant. To achieve the highest generalisability in the pooled treatment effects, a random-effects model will be used to synthesize the data for pairwise and network meta-analysis.<sup>26</sup> A pairwise meta-analysis will be conducted when at least two studies compared the same intervention and comparator. When the treatment nodes formed a network of evidence, we will do a TCIMs to compare different treatment programs using the common comparator or placebo. A network diagram of each outcome will be generated to visualize the connections between different treatment programs included. If direct evidence exists, NMA will conduct a comprehensive evaluation of direct and indirect comparative evidence. If direct comparison evidence is lacking, we will only make adjusted indirect comparisons. For each outcome, a contribution matrix will be performed to demonstrate the percentage contribution of each direct comparison to the whole evidence body. The efficacy of different treatment programs will be ranked according to the surface under the cumulative ranking curve (SUCRA).<sup>27</sup> The SUCRA is a value range from 0 to 1 and can be re-expressed as a percentage. The larger the SUCRA, the better the treatment regimen.

### *Examination of assumptions in network meta-analysis*

**Heterogeneity** The Cochran Q statistics will be employed to assess heterogeneity.<sup>28</sup> If there is significant clinical heterogeneity or methodological heterogeneity ( $P < 0.1$ ,  $I^2 > 50\%$ ), the subgroup analysis will be performed to explore sources of heterogeneity. To assess potential bias resulting from baseline risk, we will perform meta-regression with regressors which included age of participants, sample size, duration of disease, course of treatment, and so on. Besides, sensitivity analyses will be performed by excluding studies with a high risk of bias or poor-quality to judge the stability of the results.

**Transitivity** We will verify the transitivity of this network by plotting the central trends (e.g. mean, median) of patient characteristics in each treatment comparison.

**Consistency** Node-splitting analysis will be used to split mixed evidence into direct evidence and indirect evidence to evaluate the inconsistency of the model. And then, we will compare the direct and indirect evidence. If there is no statistically significant difference between direct and indirect evidence, the study fits the consistency model. If the 95% CrI of the result does not include the invalid value, the inconsistency will be considered to exist.

### *Assessment of publication bias*

The comparison-adjusted funnel plots will be obtained with the specific ranking order to detect small sample size study effects and publication bias.

All analyses will be conducted using R (version 3.6.1) with the *gemtc* package.

### Quality assessment and recommendation grading of the evidence

Two reviewers (SS Lin and QY Shi) will independently perform quality assessment and recommendation grading of the evidence of the direct, indirect and mixed estimates of all comparisons according to GRADE criteria.<sup>29, 30</sup> In particular, the GRADE system was used to rank the quality of evidence for direct comparison from four aspects: limitation, inconsistency, indirectness, and publication bias, but without imprecision.<sup>31</sup> The grading of the evidence quality includes four levels, which are 'high', 'medium', 'low' or 'very low' according to the GRADE rating standards.<sup>32, 33</sup> High indicates that the authors are very confident that the real effect is close to the estimate of the effect. Moderate indicates that the authors are moderately confident in the effect estimate: the true effect is likely to be close to the estimate of the effect, but there is a possibility that it is substantially different. Low indicates that the authors' confidence in the effect estimate is limited: the true effect may be substantially different from the estimate of the effect. Very low indicates that the authors have very little confidence in the effect estimate: the true effect is likely to be substantially different from the estimate of effect.<sup>29</sup> Cross-checking will be performed after the classification is completed. In case of disagreement, it will be decided by discussion between the two parties or judged by the third evaluator (FW Yang).

**Ethics and dissemination** This study will extract data from published literature and not involve private information from individuals or compromise their rights. Therefore, the study does not require ethical approval. The procedures of this systematic review and network meta-analysis will be conducted in accordance with the PRISMA guideline. Details of this study will be submitted to open access. The results will be published in a peer-reviewed journal and disseminated at relevant conferences.

**Contributions** SS Lin, JY Mao, and XL Wang conceived and designed the study together. SS Lin, QY Shi, and FW Yang developed the search strategy together. SS Lin drafted the protocol manuscript. All the authors have reviewed and approved the final manuscript.

**Funding** This work was supported by the "Innovation team development Plan" of the Ministry of Education-Research on the prevention and treatment of cardiovascular diseases in traditional Chinese medicine (grant number: IRT16R54).

**Competing interests** None.

### REFERENCES

1. Chinese Society of Cardiology. Guidelines for diagnosis and treatment of heart failure in China 2018. Chinese Journal of Cardiology 2018;46:760. <https://www.chinahfc.org/statics/default/myfront/zn.pdf>
2. Ponikowski P, Voors AA, Anker SD, et al. 2016 ESC Guidelines for the diagnosis and treatment of acute and chronic heart failure. Eur Heart J 2016;37:2129-200. DOI: 10.1093/eurheartj/ehw128
3. Benjamin EJ, Muntner P, Alonso A, et al. Heart disease and stroke statistics-2019 update: a report from the American heart association. Circulation 2019;139:e56-e528. DOI: 10.1161/CIR.0000000000000659
4. Cook C, Cole G, Asaria P, Jabbour R, Francis DP. The annual global economic burden of heart failure. Int J Cardiol 2014;171:368-76. DOI: 10.1016/j.ijcard.2013.12.028
5. Lu Y, Wang AY, Wei ZH, Yu SY, Zhang WW. Exploring the thinking and methods of Chinese medicine based on "holistic view". World Science and Technology/Modernization of Traditional Chinese Medicine and Materia Medica 2019;21:1-7.

- 1 <https://kns.cnki.net/KCMS/detail/detail.aspx?dbcode=CJFQ&dbname=CJFDLAST2019&filename=SJKX201901003&v=MDM4NjZZUzdEaDFUM3FUclDNMUZyQ1VSN3FmWnVSbkZDdmhXN3pQTmlmQWRyRzRIOWpNcm85Rlo0UjhlWDFMdxg=>
- 2
- 3
- 4
- 5
- 6 6. Yu SY, Lu Y. Discussion on action mechanisms of traditional Chinese medicine. *Chinese Journal of Pharmacology and Toxicology* 2018;32:347-54.
- 7
- 8 <https://kns.cnki.net/KCMS/detail/detail.aspx?dbcode=CJFQ&dbname=CJFDLAST2018&filename=YLBS201805001&v=MzEwOTJxbzIjGWIISOGVYMUx1eFITN0RoMVQzcvRyV00xRnJDVVI3cWZadVJuRkN2aFc3dk1QQ0hKZmJHNEg5bk0=>
- 9
- 10
- 11
- 12
- 13 7. Bian J, Li Z. Theory and clinical research progress of dual-direction regulation. *Chinese Journal of Urban and Rural Industrial Hygiene* 2016;31:49-51.
- 14
- 15 <https://kns.cnki.net/KCMS/detail/detail.aspx?dbcode=CJFQ&dbname=CJFDLAST2016&filename=ZCXW201609018&v=MTYxMzRya1VyeKlQeTdUZWJHNEg5Zk1wbzIFYkISOGVYMUx1eFITN0RoMVQzcvRyV00xRnJDVVI3cWZadVJuRkM=>
- 16
- 17
- 18
- 19
- 20 8. Ge MX, Feng YL, Zhang XX, Lv L, He HT. Meta-analysis of *Salvia Miltiorrhiza Ligustrazine Injection* combined with conventional medication in treatment of chronic heart failure. *Drug Evaluation Research* 2019;42:2084-91.
- 21
- 22 <https://kns.cnki.net/KCMS/detail/detail.aspx?dbcode=CJFQ&dbname=CJFDLAST2019&filename=YWPJ201910034&v=MjgwMDNVUjdxZlp1Um5GQ3JrVTcvTFBEcmJaTEc0SDlqTnI0OUdZSVI4ZVgxTHV4WVM3RGgxVDNxVHJXTTFGckM=>
- 23
- 24
- 25
- 26
- 27 9. Ou YW, Dong YJ, Zhu YL. Meta-analysis on Sofren Injection in treatment of heart failure. *Shanghai Journal of Traditional Chinese Medicine* 2019;53:37-43.
- 28
- 29 <https://kns.cnki.net/KCMS/detail/detail.aspx?dbcode=CJFQ&dbname=CJFDLAST2019&filename=SHZZ201907015&v=MDAwNDYyQ1VSN3FmWnVSbkZDcmtVNzNNTmlYUmRMRzRIOWpNcUk5RVIZUjhlWDFMdxhZUzdEaDFUM3FUclDNMUy=>
- 30
- 31
- 32
- 33
- 34
- 35 10. Xie N, Dai XH. Meta analysis on curative effects of Yiqi Fumai Injection (Lyophilization) for heart failure. *Chinese Journal of Integrative Medicine on Cardio-/Cerebrovascular Disease* 2019;17:1499-503.
- 36
- 37 <https://kns.cnki.net/KCMS/detail/detail.aspx?dbcode=CJFQ&dbname=CJFDLAST2019&filename=ZYYY201910016&v=MDkwMTFOcjQ5RVlvUjhlWDFMdxhZUzdEaDFUM3FUclDNMUZyQ1VSN3FmWnVSbkZDcmtWYnJQUHpuU2Q3RzRIOWo=>
- 38
- 39
- 40
- 41
- 42 11. Lin WJ, Li SS, Han JD, Qin YB, Wang LJ, Xian SX. The hemodynamic effects of Huangqi Injection in the treatment of chronic heart failure: a meta-analysis of clinical controlled trials. *Research and Practice on Chinese Medicines* 2019;33:63-8.
- 43
- 44 <https://kns.cnki.net/KCMS/detail/detail.aspx?dbcode=CJFQ&dbname=CJFDLAST2019&filename=JZZY201901016&v=MTg2NDI1Um5GQ3JtVTd2Skx6ZlJkN0c0SDlqTXJvOUVZb1I4ZVgxTHV4WVM3RGgxVDNxVHJXTTFGckNVUjdxZlo=>
- 45
- 46
- 47
- 48
- 49
- 50 12. Zhu YH, Shen XX, Han QQ, Zhao J. A meta-analysis of Shenfu Injection in myocardial infarction with heart failure. *Chinese Journal of Evidence-Based Cardiovascular Medicine* 2018;10:402-406.
- 51
- 52 <https://kns.cnki.net/KCMS/detail/detail.aspx?dbcode=CJFQ&dbname=CJFDLAST2018&filename=PZXX201804005&v=MTg0NjdmWnVSbkZDcm1WThpOTIRmVGRyRzRIOW5NcTQ5RIIZUjhlWDFMdxhZUzdEaDFUM3FUclDNMUZyQ1VSN3E=>
- 53
- 54
- 55
- 56
- 57 13. Xu T, Shi XQ, Wang F, Liu RX. Effectiveness and safety of Shenmai injection in the treatment of heart failure. *Journal of Community Medical* 2018;16:53-56.
- 58
- 59 <https://kns.cnki.net/KCMS/detail/detail.aspx?dbcode=CJFQ&dbname=CJFDLAST2018&filename=SQYX201807022&v=MDYzZmRzVHJXTTFGckNVUjdxZlp1Um5GQ3JtV3JyTk5qelNkckc0SDluTXFJOUhab1I4ZVgxTHV4WV=>
- 60

1 VM3RGgxVDM=  
2

- 3 14. Wang KH, Wu JR, Duan XJ, Zhang D, Zhang XM, Zhang B. Meta-analysis on randomized controlled trials  
4 of Shenqi Fuzheng Injection in the treatment of chronic heart failure . Chinese Journal of Pharmacoepidemiology  
5 2018;27:27-32.  
6  
7 [https://kns.cnki.net/KCMS/detail/detail.aspx?dbcode=CJFQ&dbname=CJFDLAST2018&filename=YWLX201801](https://kns.cnki.net/KCMS/detail/detail.aspx?dbcode=CJFQ&dbname=CJFDLAST2018&filename=YWLX201801008&v=MjAzMDBIWDFMdXhZUZdEaDFUM3FUclDNMUZyQ1VSN3FmWnVSbkZDcm5VTHJPUERySGRyRzRIOW5Ncm85RmJJUjg=)  
8 [008&v=MjAzMDBIWDFMdXhZUZdEaDFUM3FUclDNMUZyQ1VSN3FmWnVSbkZDcm5VTHJPUERySGRyR](https://kns.cnki.net/KCMS/detail/detail.aspx?dbcode=CJFQ&dbname=CJFDLAST2018&filename=YWLX201801008&v=MjAzMDBIWDFMdXhZUZdEaDFUM3FUclDNMUZyQ1VSN3FmWnVSbkZDcm5VTHJPUERySGRyRzRIOW5Ncm85RmJJUjg=)  
9 [zRIOW5Ncm85RmJJUjg=](https://kns.cnki.net/KCMS/detail/detail.aspx?dbcode=CJFQ&dbname=CJFDLAST2018&filename=YWLX201801008&v=MjAzMDBIWDFMdXhZUZdEaDFUM3FUclDNMUZyQ1VSN3FmWnVSbkZDcm5VTHJPUERySGRyRzRIOW5Ncm85RmJJUjg=)  
10
- 11 15. Lu XH, Zhang L, Wang JB, et al. Clinical efficacy and safety of xinmailong injection for the treatment of chronic  
12 heart failure: A meta-analysis. *Front Pharmacol* 2018;9:810. DOI: 10.3389/fphar.2018.00810  
13  
14
- 15 16. Wang K, Wu J, Duan X, et al. Huangqi injection in the treatment of chronic heart failure: A systematic review and  
16 meta-analysis. *Medicine (Baltimore)* 2017;96:e8167. DOI: 10.1097/MD.00000000000008167  
17  
18
- 19 17. Bai D, Yue GX, Wang RH, Miao Q, Xu J, Liu LM. Clinical characteristics of five traditional Chinese medicine  
20 injections in treating heart failure based on Meta-analysis literature. *Zhongguo Zhong Yao Za Zhi* 2018;43:4152-62.  
21 DOI: 10.19540/j.cnki.cjcmm.20180709.002  
22
- 23 18. Yang FW, Zou JH, Wang Y, et al. Network meta-analysis of Chinese medical injections for heart failure. *Zhongguo*  
24 *Zhong Yao Za Zhi* 2018;43:1247-53. DOI: 10.19540/j.cnki.cjcmm.2018.0049  
25
- 26 19. Wang KH, Wu JR, Zhang D, Duan XJ, Ni MW. Comparative efficacy of Chinese herbal injections for treating  
27 chronic heart failure: a network meta-analysis. *BMC Complement Altern Med* 2018;18:41. DOI: 10.1186/s12906-  
28 018-2090-3  
29
- 30 20. Jonas DE, Wilkins TM, Bangdiwala S, et al. Findings of Bayesian mixed treatment comparison meta-analyses:  
31 comparison and exploration using real-world trial data and simulation. Rockville (MD): Agency for Healthcare  
32 Research and Quality (US) 2013;Report No.: 13-EHC039-EF. [https://pubmed.ncbi.nlm.nih.gov/23469378-findings-](https://pubmed.ncbi.nlm.nih.gov/23469378-findings-of-bayesian-mixed-treatment-comparison-meta-analyses-comparison-and-exploration-using-real-world-trial-data-and-simulation-internet/?from_single_result=Findings+of+Bayesian+Mixed+Treatment+Comparison+Meta-Analyses%3A+Comparison+and+Exploration+Using+Real-World+Trial+Data+and+Simulation)  
33 [of-bayesian-mixed-treatment-comparison-meta-analyses-comparison-and-exploration-using-real-world-trial-data-](https://pubmed.ncbi.nlm.nih.gov/23469378-findings-of-bayesian-mixed-treatment-comparison-meta-analyses-comparison-and-exploration-using-real-world-trial-data-and-simulation-internet/?from_single_result=Findings+of+Bayesian+Mixed+Treatment+Comparison+Meta-Analyses%3A+Comparison+and+Exploration+Using+Real-World+Trial+Data+and+Simulation)  
34 [and-simulation-internet/?from\\_single\\_result=Findings+of+Bayesian+Mixed+Treatment+Comparison+Meta-](https://pubmed.ncbi.nlm.nih.gov/23469378-findings-of-bayesian-mixed-treatment-comparison-meta-analyses-comparison-and-exploration-using-real-world-trial-data-and-simulation-internet/?from_single_result=Findings+of+Bayesian+Mixed+Treatment+Comparison+Meta-Analyses%3A+Comparison+and+Exploration+Using+Real-World+Trial+Data+and+Simulation)  
35 [Analyses%3A+Comparison+and+Exploration+Using+Real-World+Trial+Data+and+Simulation](https://pubmed.ncbi.nlm.nih.gov/23469378-findings-of-bayesian-mixed-treatment-comparison-meta-analyses-comparison-and-exploration-using-real-world-trial-data-and-simulation-internet/?from_single_result=Findings+of+Bayesian+Mixed+Treatment+Comparison+Meta-Analyses%3A+Comparison+and+Exploration+Using+Real-World+Trial+Data+and+Simulation)  
36  
37  
38  
39
- 40 21. Jansen JP, Crawford B, Bergman G, Stam W. Bayesian meta-analysis of multiple treatment comparisons: an  
41 introduction to mixed treatment comparisons. *Value in health: the journal of the International Society for*  
42 *Pharmacoeconomics and Outcomes Research* 2008;11:956-64. DOI: 10.1111/j.1524-4733.2008.00347.x  
43  
44
- 45 22. Higgins J and Thomas J (senior editors). *Cochrane Handbook for Systematic Reviews of Interventions* Version 6.  
46 updated 2019. <https://training.cochrane.org/handbook/current>  
47
- 48 23. Moher D, Liberati A, Tetzlaff J, Altman DG, PRISMA Group. Preferred reporting items for systematic reviews and  
49 meta-analyses: the PRISMA statement. *Plos Med* 2009;6:e1000097. DOI: 10.1371/journal.pmed.1000097  
50
- 51 24. Higgins JPT, Altman DG, Gøtzsche PC, et al. The Cochrane Collaboration's tool for assessing risk of bias in  
52 randomised trials. *BMJ (Clinical research ed.)* 2011;343:d5928. DOI: 10.1136/bmj.d5928  
53
- 54 25. Brooks SP, Gelman A. General methods for monitoring convergence of iterative simulations. *J Comput Graph Stat*  
55 1998;7:434-455. <http://www2.stat.duke.edu/~scs/Courses/Stat376/Papers/ConvergeDiagnostics/BrooksGelman.pdf>  
56  
57
- 58 26. Dias S, Sutton AJ, Ades AE, Welton NJ. Evidence synthesis for decision making 2: a generalized linear modeling  
59 framework for pairwise and network meta-analysis of randomized controlled trials. *Med Decis Making* 2013;33:607-  
60 17. DOI: 10.1177/0272989X12458724



- 1 27. Rucker G, Schwarzer G. Ranking treatments in frequentist network meta-analysis works without resampling methods.  
2 BMC Med Res Methodol 2015;15:58. DOI: 10.1186/s12874-015-0060-8  
3
- 4 28. Zheng H, Chen Q, Chen M, et al. Nonpharmacological conservative treatments for chronic functional constipation:  
5 A systematic review and network meta-analysis. Neurogastroenterol Motil 2019;31:e13441. DOI:  
6 10.1111/nmo.13441  
7
- 8 29. Balshem H, Helfand M, Schünemann HJ, et al. GRADE guidelines: 3. Rating the quality of evidence. J Clin  
9 Epidemiol 2011;64:401-6. DOI: 10.1016/j.jclinepi.2010.07.015  
10
- 11 30. Puhan MA, Schünemann HJ, Murad MH, et al. A GRADE Working Group approach for rating the quality of  
12 treatment effect estimates from network meta-analysis. BMJ (Clinical research ed.) 2014;349:g5630. DOI:  
13 10.1136/bmj.g5630  
14
- 15 31. Brignardello-Petersen R, Bonner A, Alexander PE, et al. Advances in the GRADE approach to rate the certainty in  
16 estimates from a network meta-analysis. J Clin Epidemiol 2018;93:36-44. DOI: 10.1016/j.jclinepi.2017.10.005  
17
- 18 32. Guyatt GH, Oxman AD, Schünemann HJ, Tugwell P, Knottnerus A. GRADE guidelines: a new series of articles in  
19 the Journal of Clinical Epidemiology. J Clin Epidemiol 2011;64:380-2. DOI: 10.1016/j.jclinepi.2010.09.011  
20
- 21 33. Guyatt GH, Oxman AD, Vist GE, et al. GRADE: an emerging consensus on rating quality of evidence and strength  
22 of recommendations. BMJ (Clinical research ed.) 2008;336:924-6. DOI: 10.1136/bmj.39489.470347.AD  
23  
24  
25  
26  
27  
28  
29  
30  
31  
32  
33  
34  
35  
36  
37  
38  
39  
40  
41  
42  
43  
44  
45  
46  
47  
48  
49  
50  
51  
52  
53  
54  
55  
56  
57  
58  
59  
60

1 **Figure caption**

2  
3  
4 Figure 1 Proposed flowchart of the literature search process

5  
6  
7  
8  
9  
10  
11  
12  
13  
14  
15  
16  
17  
18  
19  
20  
21  
22  
23  
24  
25  
26  
27  
28  
29  
30  
31  
32  
33  
34  
35  
36  
37  
38  
39  
40  
41  
42  
43  
44  
45  
46  
47  
48  
49  
50  
51  
52  
53  
54  
55  
56  
57  
58  
59  
60

For peer review only

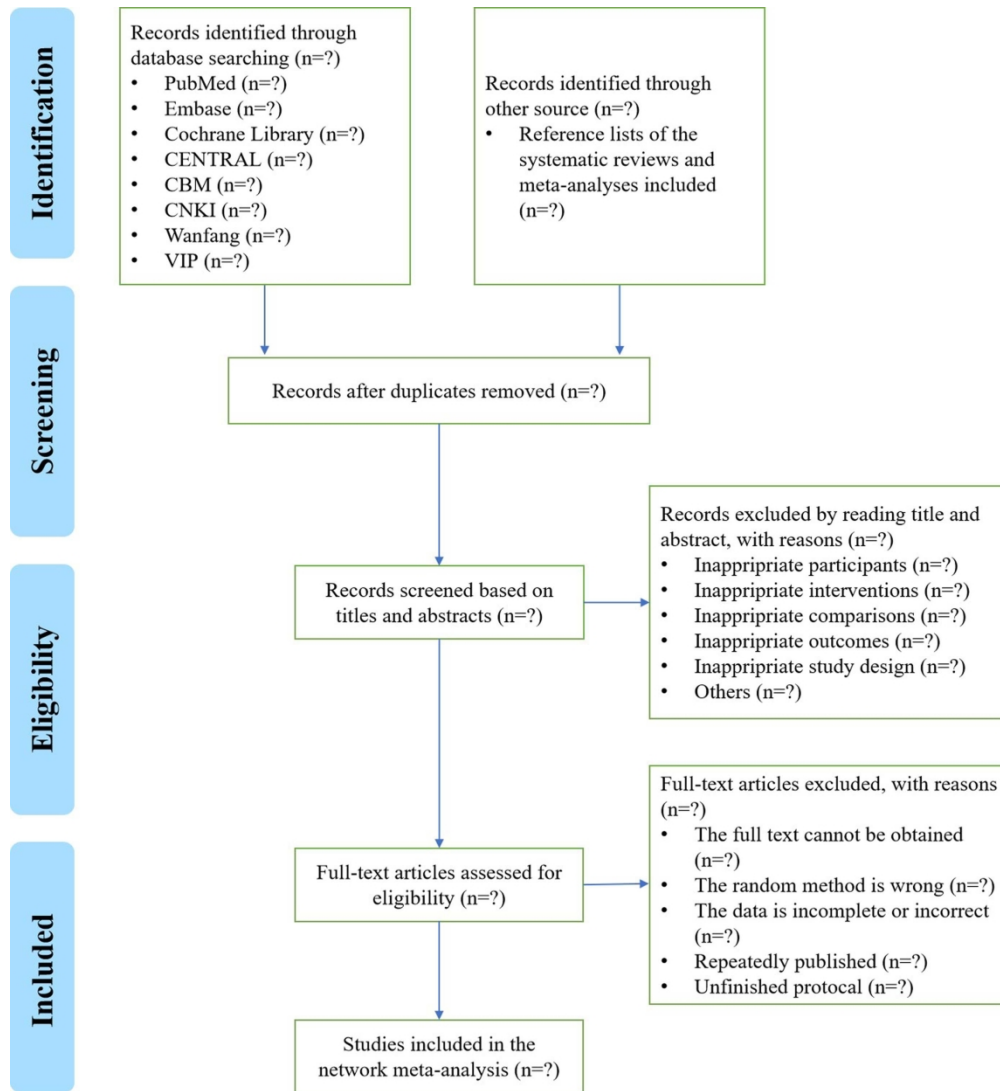

Figure 1 Proposed flowchart of the literature search process

234x254mm (300 x 300 DPI)



## Annex 1 Search Strategy in PubMed

1  
2  
3  
4  
5  
6  
7  
8  
9  
10  
11  
12  
13  
14  
15  
16  
17  
18  
19  
20  
21  
22  
23  
24  
25  
26  
27  
28  
29  
30  
31  
32  
33  
34  
35  
36  
37  
38  
39  
40  
41  
42  
43  
44  
45  
46  
47  
48  
49  
50  
51  
52  
53  
54  
55  
56  
57  
58  
59  
60

| Search | Query                                                                                                                         | Items found |
|--------|-------------------------------------------------------------------------------------------------------------------------------|-------------|
| #1     | Heart Failure[MeSH Terms]                                                                                                     |             |
| #2     | heart failure[Title/Abstract]                                                                                                 |             |
| #3     | cardiac failure[Title/Abstract]                                                                                               |             |
| #4     | heart decompensation[Title/Abstract]                                                                                          |             |
| #5     | heart dysfunction[Title/Abstract]                                                                                             |             |
| #6     | cardiac dysfunction[Title/Abstract]                                                                                           |             |
| #7     | ventricular dysfunction[Title/Abstract]                                                                                       |             |
| #8     | heart dificiency[Title/Abstract]                                                                                              |             |
| #9     | cardiac dificiency[Title/Abstract]                                                                                            |             |
| #10    | heart insufficiency[Title/Abstract]                                                                                           |             |
| #11    | cardiac insufficiency[Title/Abstract]                                                                                         |             |
| #12    | #1 OR #2 OR #3 OR #4 OR #5 OR #6 OR #7 OR #8 OR #9 OR #10 OR #11                                                              |             |
| #13    | Medicine, Chinese Traditional[Mesh]                                                                                           |             |
| #14    | traditional Chinese medicine[All Fields]                                                                                      |             |
| #15    | Chinese traditional medicine[All Fields]                                                                                      |             |
| #16    | Chinese medicine[All Fields]                                                                                                  |             |
| #17    | Drugs, Chinese Herbal[Mesh]                                                                                                   |             |
| #18    | Chinese herbal drug\$[All Fields]                                                                                             |             |
| #19    | Chinese herbal medicine[All Fields]                                                                                           |             |
| #20    | Chinese patent drug\$[All Fields]                                                                                             |             |
| #21    | Chinese patent medicine[All Fields]                                                                                           |             |
| #22    | Chinese proprietary drug[All Fields]                                                                                          |             |
| #23    | Chinese proprietary medicine[All Fields]                                                                                      |             |
| #24    | Chinese crude drug\$[All Fields]                                                                                              |             |
| #25    | Chinese materia medica[All Fields]                                                                                            |             |
| #26    | traditional Chinese medicine patent prescription\$[All Fields]                                                                |             |
| #27    | traditional Chinese patent medicines and simple preparations[All Fields]                                                      |             |
| #28    | traditional Chinese medicine injection\$[All Fields]                                                                          |             |
| #29    | Chinese medicine injection\$[All Fields]                                                                                      |             |
| #30    | Complementary Therapies[MeSH]                                                                                                 |             |
| #31    | #13 OR #14 OR #15 OR #16 OR #17 OR #18 OR #19 OR #20 OR #21 OR #22 OR #23<br>OR #24 OR #25 OR #26 OR #27 OR #28 OR #29 OR #30 |             |
| #32    | Injections[MeSH]                                                                                                              |             |
| #33    | injection\$[Title/Abstract]                                                                                                   |             |
| #34    | injectable\$[Title/Abstract]                                                                                                  |             |
| #35    | #32 OR #33 OR #34                                                                                                             |             |
| #36    | Randomized Controlled Trials as Topic[Mesh]                                                                                   |             |
| #37    | Randomized Controlled Trial[Publication Type]                                                                                 |             |
| #38    | Controlled Clinical Trial[Publication Type]                                                                                   |             |
| #39    | Equivalence Trial[Publication Type]                                                                                           |             |
| #40    | randomized controlled trial[Title/Abstract]                                                                                   |             |
| #41    | Random Allocation[Mesh]                                                                                                       |             |
| #42    | Double-Blind Method[Mesh]                                                                                                     |             |
| #43    | Single-Blind Method[Mesh]                                                                                                     |             |
| #44    | Clinical Trial[Publication Type]                                                                                              |             |

1 #45 Research Design[Mesh]  
2 #46 Placebos[Mesh]  
3 #47 placebo\$[Title/Abstract]  
4 #48 random\*[Title/Abstract]  
5 #49 trial\$[Title]  
6 #36 OR #37 OR #38 OR #39 OR #40 OR #41 OR #42 OR#43 OR #44 OR #45 OR #46  
7 #50 OR #47 OR #48 OR #49  
8 #51 Systemic Review[Publication Type]  
9 #52 systemic review[Title/Abstract]  
10 #53 systemic literature review[Title/Abstract]  
11 #54 Meta Analysis[Publication Type]  
12 #55 Meta analysis[Title/Abstract]  
13 #56 Meta-analysis[Publication Type]  
14 #57 Meta-analysis[Title/Abstract]  
15 #58 pooled analysis[Title/Abstract]  
16 #59 Consensus Development Conference as Topic[Mesh]  
17 #60 Consensus Development Conference[Publication Type]  
18 #61 consensus development conference[Title/Abstract]  
19 #62 expert consensus[Title/Abstract]  
20 #63 Practice Guideline as Topic[Mesh]  
21 #64 Practice Guideline[Publication Type]  
22 #65 practice guideline[Title/Abstract]  
23 #66 Cochrane database systemic review[Title/Abstract]  
24 #67 Evidence-based Medicine[Mesh]  
25 #68 evidence-based medicine[Title/Abstract]  
26 #69 best practice[Title/Abstract]  
27 #70 evidence synthesis[Title/Abstract]  
28 #71 synthesis analysis[Title/Abstract]  
29 #51 OR #52 OR #53 OR #54 OR #55 OR #56 OR #57 OR #58 OR #59 OR #60 OR #61  
30 #72 OR #62 OR #63 OR #64 OR #65 OR #66 OR #67 OR #68 OR #69 OR #70 OR #71  
31 #73 #12 AND #31 AND #35 AND #50 AND #72

---

# BMJ Open

## Traditional Chinese medicine injections for heart failure: a protocol for systematic review and network meta-analysis of randomized controlled trials

|                                 |                                                                                                                                                                                                                                                                                                                                                                                                                                                                                                                                                 |
|---------------------------------|-------------------------------------------------------------------------------------------------------------------------------------------------------------------------------------------------------------------------------------------------------------------------------------------------------------------------------------------------------------------------------------------------------------------------------------------------------------------------------------------------------------------------------------------------|
| Journal:                        | <i>BMJ Open</i>                                                                                                                                                                                                                                                                                                                                                                                                                                                                                                                                 |
| Manuscript ID                   | bmjopen-2020-037331.R2                                                                                                                                                                                                                                                                                                                                                                                                                                                                                                                          |
| Article Type:                   | Protocol                                                                                                                                                                                                                                                                                                                                                                                                                                                                                                                                        |
| Date Submitted by the Author:   | 11-Jul-2020                                                                                                                                                                                                                                                                                                                                                                                                                                                                                                                                     |
| Complete List of Authors:       | Lin, Shan-Shan; First Teaching Hospital of Tianjin University of Traditional Chinese Medicine, Cardiovascular Department<br>Shi, Qingyang; Tianjin University of Traditional Chinese Medicine, Graduate school<br>Yang, Fengwen; Tianjin University of Traditional Chinese Medicine, Evidence based Medicine Center<br>Wang, Xianliang; First Teaching Hospital of Tianjin University of Traditional Chinese Medicine<br>Mao, Jingyuan; First Teaching Hospital of Tianjin University of Traditional Chinese Medicine, Cardiovascular Departmen |
| <b>Primary Subject Heading</b>: | Cardiovascular medicine                                                                                                                                                                                                                                                                                                                                                                                                                                                                                                                         |
| Secondary Subject Heading:      | Complementary medicine, Cardiovascular medicine, Evidence based practice                                                                                                                                                                                                                                                                                                                                                                                                                                                                        |
| Keywords:                       | Heart failure < CARDIOLOGY, COMPLEMENTARY MEDICINE, Clinical trials < THERAPEUTICS, Herbal medicine < THERAPEUTICS, Adverse events < THERAPEUTICS                                                                                                                                                                                                                                                                                                                                                                                               |
|                                 |                                                                                                                                                                                                                                                                                                                                                                                                                                                                                                                                                 |

SCHOLARONE™  
Manuscripts



I, the Submitting Author has the right to grant and does grant on behalf of all authors of the Work (as defined in the below author licence), an exclusive licence and/or a non-exclusive licence for contributions from authors who are: i) UK Crown employees; ii) where BMJ has agreed a CC-BY licence shall apply, and/or iii) in accordance with the terms applicable for US Federal Government officers or employees acting as part of their official duties; on a worldwide, perpetual, irrevocable, royalty-free basis to BMJ Publishing Group Ltd ("BMJ") its licensees and where the relevant Journal is co-owned by BMJ to the co-owners of the Journal, to publish the Work in this journal and any other BMJ products and to exploit all rights, as set out in our [licence](#).

The Submitting Author accepts and understands that any supply made under these terms is made by BMJ to the Submitting Author unless you are acting as an employee on behalf of your employer or a postgraduate student of an affiliated institution which is paying any applicable article publishing charge ("APC") for Open Access articles. Where the Submitting Author wishes to make the Work available on an Open Access basis (and intends to pay the relevant APC), the terms of reuse of such Open Access shall be governed by a Creative Commons licence – details of these licences and which [Creative Commons](#) licence will apply to this Work are set out in our licence referred to above.

Other than as permitted in any relevant BMJ Author's Self Archiving Policies, I confirm this Work has not been accepted for publication elsewhere, is not being considered for publication elsewhere and does not duplicate material already published. I confirm all authors consent to publication of this Work and authorise the granting of this licence.

1  
2  
3  
4  
5  
6  
7  
8  
9  
10  
11  
12  
13  
14  
15  
16  
17  
18  
19  
20  
21  
22  
23  
24  
25  
26  
27  
28  
29  
30  
31  
32  
33  
34  
35  
36  
37  
38  
39  
40  
41  
42  
43  
44  
45  
46  
47  
48  
49  
50  
51  
52  
53  
54  
55  
56  
57  
58  
59  
60

## **Traditional Chinese medicine injections for heart failure: a protocol for systematic review and network meta-analysis of randomized controlled trials**

Shan-Shan Lin,<sup>1</sup> Qing-Yang Shi,<sup>2</sup> Feng-Wen Yang,<sup>3</sup> Xian-Liang Wang,<sup>1,\*</sup> and Jing-Yuan Mao<sup>1,\*</sup>

<sup>1</sup> Cardiovascular Department, First Teaching Hospital of Tianjin University of Traditional Chinese Medicine, Tianjin 300381, China

<sup>2</sup> Tianjin University of Traditional Chinese Medicine, Tianjin 301617, China

<sup>3</sup> Evidence-Based Medicine Center, Tianjin University of Traditional Chinese Medicine, Tianjin301617, China

E-mail: Shan-Shan Lin: linshanshan1001@163.com; Qing-Yang Shi: qingyang.shi@qq.com; Feng-Wen Yang: 13682027022@163.com; Xian-Liang Wang: xliwang1981@126.com; Jing-Yuan Mao: jymao@126.com.

\* Corresponding author: Xian-Liang Wang and Jing-Yuan Mao.

Xian-Liang Wang, Cardiovascular Department, First Teaching Hospital of Tianjin University of Traditional Chinese Medicine, 88 Changling Road, Xiqing District, Tianjin 300381, China (e-mail: xliwang1981@126.com; telephone number: 0086(22)27986333)

Jing-Yuan Mao, Cardiovascular Department, First Teaching Hospital of Tianjin University of Traditional Chinese Medicine, 88 Changling Road, Xiqing District, Tianjin 300381, China (e-mail: jymao@126.com; telephone number: 0086(22)27986000)

## ABSTRACT

**Introduction:** Heart failure (HF) has always been an important issue in global public health. The research and development of traditional Chinese medicine (TCM) provide more possibilities for improving the prognosis of HF patients. Because multiple traditional Chinese medicine injections (TCMIs) are being widely applied in clinical work, it is important to choose the right TCMIs for HF patients. The purpose of this study is to assess and compare the effect of different TCMIs for HF using network meta-analysis (NMA) and further provide references for clinical decision-making.

**Methods and analysis:** The clinical randomized controlled trials (RCTs) and meta-analyses of TCMIs for treating HF will be searched in the relevant database, including PubMed, EMBASE, Cochrane Library (No.2 of 2020), Chinese BioMedical Literature Database (CBM), China National Knowledge Infrastructure (CNKI), Wan Fang database and VIP database from inception to February 29, 2020. The outcomes of interest include all-cause mortality, rehospitalization rate, left ventricular ejection fraction (LVEF), left ventricular end-diastolic diameter (LVEDD), left ventricular end-systolic diameter (LVESD), brain natriuretic peptide (BNP), N-terminal pro-brain natriuretic peptide (NT-proBNP), cardiac output (CO), stroke volume (SV), 6 minutes walking distance, and adverse events. The risk of bias assessment of the included RCTs will be conducted according to the Cochrane Collaboration's tool for assessing the risk of bias. NMA will be performed in a Bayesian hierarchical framework using R (version 3.6.1) with the *gemtc* package. Finally, we will rank the efficacy of these treatment programs according to the surface under the cumulative ranking curve (SUCRA), and perform quality assessment and recommendation grading of the evidence according to the Grading of Recommendations Assessment, Development and Evaluation (GRADE) system.

**Ethics and dissemination:** This study will extract data from published literature and not involve private information from individuals or compromise their rights. Therefore, the study does not require ethical approval. The results will eventually be published in a peer-reviewed journal and disseminated at relevant conferences.

**PROSPERO registration number:** CRD42020166900.

### Strengths and limitations of this study

- Compared with traditional pairwise meta-analysis, NMA can comprehensively analyze direct and indirect comparison results of different TCMIs for HF to obtain more reliable conclusions.
- Compared with traditional pairwise meta-analysis, NMA can compare and rank the efficacy of different TCMIs for HF.
- This study can provide more comprehensive suggestions and references for clinical decision-making and guideline development.
- Since most TCMIs and clinical trials will come from China, the conclusion may have certain limitations.
- This study did not explore the economic benefits of these drugs, and further exploration can be done based on the results of this study.

## INTRODUCTION

Heart failure (HF) is a complex set of clinical syndromes caused by abnormal changes in the structure and/or function of the heart that impair ventricular contraction and/or diastolic function.<sup>1</sup> HF is a severe end-stage of heart disease. Due to the high mortality rate, HF has become an important issue in global public health.<sup>2</sup> According to the 2016 European Society of Cardiology Guidelines for the diagnosis and treatment of acute and chronic heart failure, current treatment options for HF are diverse, generally including cardiotonic, diuretic, vasodilator, angiotensin-converting enzyme inhibitor (ACEI), angiotensin receptor blocker (ARB),  $\beta$ -blocker, and so on. Modern medicine has made great progress in the field of HF,

1 but the prognosis of HF patients is still not satisfactory, resulting in a heavy global burden.<sup>3, 4</sup> The development of new  
2 therapeutic drugs is an inevitable trend of future medical development. The research and development of traditional  
3 Chinese medicine (TCM) provide more possibilities for improving the prognosis of HF patients. TCM has the advantages  
4 of multi-target effect and bidirectional regulation, so there has been increasing attention in the global medical field.<sup>5-7</sup> With  
5 the development of modernization of TCM, more and more traditional Chinese medicine injections (TCMIs) for the  
6 treatment of HF have been developed and widely used in clinical practice. Many studies have shown that loading TCMIs  
7 based on conventional pharmacotherapy (CPT) can effectively improve the clinical symptoms and reduce the incidence of  
8 cardiovascular events and adverse reactions in HF patients.<sup>8-17</sup> However, due to the lack of direct comparison studies  
9 between TCMIs, the comparative results between TCMIs are unclear. Therefore, although the increasing variety of drugs  
10 has provided doctors and patients with more choices, meanwhile it is also a new challenge to choose the best treatment  
11 scheme at the same time.  
12  
13  
14  
15

16 Meta-analysis is one of the highest levels of evidence in evidence-based research. However, it is difficult to compare the  
17 effects of multiple drugs at the same time by traditional pairwise meta-analysis. Network meta-analysis (NMA) is a further  
18 development based on the traditional pairwise meta-analysis. Based on the current clinical research data, NMA can  
19 complete direct and indirect comparisons among different TCMIs at the same time, and further comprehensively analyze  
20 the results of the direct and indirect comparison, to obtain the efficacy ranking of multiple drugs. At present, some  
21 researchers have performed the NMA on randomized controlled trials (RCTs) of TCMIs for HF.<sup>18, 19</sup> However, there are  
22 some shortcomings in the published literature: ①The types of TCMIs included are not comprehensive. Only a few  
23 commonly used drugs have been studied, which severely limits the development and utilization of other potentially  
24 effective drugs. ②Results of the most important clinical outcomes have not been reported, such as all-cause mortality and  
25 rehospitalization rate. ③The research data has not been updated in the past two years. Therefore, we conceived and  
26 designed this study to make up for the above shortcomings. We will comprehensively retrieve relevant data to assess and  
27 compare the effectiveness and safety of different TCMIs for the treatment of HF using NMA. The results of this study will  
28 provide more updated comprehensive evidence for clinical decision-making.  
29  
30  
31  
32  
33

## 34 OBJECTIVES

35  
36  
37 We will systematically search all clinical RCTs on TCMIs for HF and perform a Bayesian network meta-analysis.<sup>20, 21</sup> The  
38 purpose is to explore the efficacy and safety of TCMIs in the treatment of HF, and to rank the clinical efficacy of drugs.  
39  
40

## 41 METHODS AND ANALYSIS

### 42 Patient and public involvement

43  
44  
45 Patients and the public were not involved in the design or conduct of the study.  
46  
47

### 48 Inclusion and exclusion criteria for clinical RCTs

#### 49 *Type of participants*

50  
51  
52 The included studies must indicate that participants meet the diagnostic criteria for HF in the “Guidelines for diagnosis  
53 and treatment of heart failure in China 2018” or “2016 ESC Guidelines for the diagnosis and treatment of acute and chronic  
54 heart failure”.<sup>1, 2</sup> Primary diseases include coronary heart disease, hypertension, dilated cardiomyopathy, and rheumatic  
55 heart disease. There are no restrictions on gender, age, race, duration of disease, source of the case, and follow-up time.  
56  
57  
58  
59

#### 60 *Type of interventions and comparisons*

The following forms of intervention will be included: conventional pharmacotherapy (CPT) + TCMI versus CPT alone,

CPT + TCMi versus CPT + placebo, CPT + TCMi A versus CPT + TCMi B. CPTs include cardiotoxic, diuretic, vasodilator, angiotensin-converting enzyme inhibitor (ACEI), angiotensin receptor blocker (ARB),  $\beta$ -blocker, and so on. And CPTs in the two groups should be the same. TCMIs must have been included in *the Pharmacopoeia of the People's Republic of China* or approved by *the China Food and Drug Administration*. All retrieved eligible TCMIs may be included in the study, but TCMIs without literature support will not be compared and ranked.

### **Outcomes**

Only studies using at least one of the following outcomes may be included.

#### ►Primary outcomes

- ①All-cause mortality during different follow-up periods - e.g. 3 months; 6 months; 1 year or other periods
- ②Rehospitalization rate during different follow-up periods - e.g. 3 months; 6 months; 1 year or other periods

#### ►Secondary outcomes

- ①Left ventricular ejection fraction (LVEF)
- ②Left ventricular end-diastolic diameter (LVEDD)
- ③Left ventricular end-systolic diameter (LVESD)
- ④Brain natriuretic peptide (BNP)
- ⑤N-terminal pro-brain natriuretic peptide (NT-proBNP)
- ⑥Cardiac output (CO)
- ⑦Stroke volume (SV)
- ⑧6-minute walking test (6MWT)

#### ►Adverse events

The adverse events that occurred during the study period include allergic reactions, bleeding events, gastrointestinal discomfort, liver and kidney damage, and others.

### **Type of study**

Randomized controlled trials (RCTs) that investigated the effectiveness and safety of TCHI for HF will be included.

### **Exclusion criteria**

►Participants are any of the following: the primary disease is congenital heart disease, pulmonary heart disease, hypertrophic cardiomyopathy, restrictive cardiomyopathy, constrictive pericarditis, systemic invasive disease, hyperthyroid heart disease, alcoholic myocardium disease, perinatal cardiomyopathy, drug-induced cardiomyopathy, Keshan disease.

►Participants are any of the following: heart failure with malignant arrhythmias, malignant tumors, hypothyroidism, severe liver and kidney dysfunction, or severe infections.

►Studies on the mixed efficacy of TCHIs combined with other TCM treatments will be excluded. For example, interventions have combined TCM decoctions, oral Chinese patent medicines, acupuncture, etc.



- 1 ▶None of the outcome indicators for this study.
- 2
- 3 ▶The full text cannot be obtained after seeking help online or contacting the corresponding author via email.
- 4
- 5 ▶The data are incomplete or incorrect, and the data cannot be used for synthesis.
- 6
- 7 ▶Studies with imbalanced or incomparable baseline data between the two groups.
- 8
- 9 ▶For duplicate literature, choose the one published earlier.
- 10
- 11 ▶Unfinished protocol.
- 12

## 13 **Methods of obtaining data and analyzing data**

### 14 *Search strategy*

15  
16  
17  
18  
19 The clinical RCTs and meta-analyses of TCMI for treating HF will be searched in the relevant database, including  
20 PubMed, EMBASE, Cochrane Library (No.2 of 2020), Chinese BioMedical Literature Database (CBM), China National  
21 Knowledge Infrastructure (CNKI), Wan Fang database and VIP database without language restriction. The retrieval time  
22 is from inception to February 29, 2020. Search terms include heart failure, traditional Chinese medicine injection, names  
23 of TCMI that have been used in the clinic, randomized controlled trial, systemic review, meta-analysis, and their  
24 synonyms. The search strategy adopts a combination of Medical Subject Heading and free-text terms, and adopts different  
25 search strategies according to the characteristics of each database. The synonyms in the group are connected by “or”, and  
26 the search terms between the groups are connected by “and”. At the same time, we will also retrieve conference papers  
27 and dissertations, search and browse and review references of meta-analyses, conduct search engines such as Google  
28 Scholar to avoid omissions. The development of the search strategy has been completed by the researcher SS Lin with  
29 clinical work experience and the researcher QY Shi with evidence-based work experience, and has been modified  
30 according to the Cochrane Handbook for Systematic Reviews.<sup>22</sup> Take PubMed as an example. The detailed search strategy  
31 is shown in Annex 1.

### 32 *Literature screening*

33  
34  
35  
36  
37  
38  
39 Records from databases will be managed by NoteExpress (V3.2.0) software. First, we will import all retrieved records  
40 into NoteExpress and exclude duplicate records. Second, by reading the title and abstract of each record, we will exclude  
41 records that do not meet the inclusion and exclusion criteria. Finally, we will download and read the full texts of  
42 potentially relevant studies to perform the second screening. At the same time, the reasons for excluding records after  
43 reading the full text will be reported in detail. Literature screening will be done independently and cross-checked by two  
44 researchers (SS Lin and QY Shi). Disagreement will be determined through discussion between the two investigators.  
45 When consensus cannot be reached, a third investigator (FW Yang) will assist in the judgment. The literature screening  
46 based on PRISMA is shown in Figure 1.<sup>23</sup> In the early stage of the study, we will train the evaluators and conduct pre-  
47 tests to ensure a standardized screening process.

### 48 *Data extraction and management*

49  
50  
51  
52  
53  
54  
55  
56  
57  
58  
59  
60  
Data extraction will be performed independently by two investigators (SS Lin and QY Shi) and cross-checked.  
Disagreement will be determined through discussion between the two investigators. When consensus cannot be reached,  
a third investigator (FW Yang) will assist in the judgment. The preset information extraction items are shown in Table 1.

**Table 1 Information extraction items**

| Categories            | Specific items                                                                                                                                                                    |
|-----------------------|-----------------------------------------------------------------------------------------------------------------------------------------------------------------------------------|
| Study characteristics | title, first author, journal name, publication year, and type of study                                                                                                            |
| Participants          | diagnostic criteria, sample size, gender, age, ethnicity, case source, and baseline status                                                                                        |
| Intervention          | drug name, medication route, drug dose, course of treatment, and patient compliance                                                                                               |
| Control               | drug name, medication route, drug dose, course of treatment, and patient compliance                                                                                               |
| Outcomes              | whether there is an intention-to-treat, loss to follow-up and withdrawal, outcomes                                                                                                |
| Risk of bias          | random sequence generation, allocation concealment, participant and personnel blinding, outcome assessment blinding, incomplete outcome data, selective reporting, and other bias |
| Others                | author's main conclusions, funding, and others                                                                                                                                    |

### ***Dealing with missing data***

When data is missing, we will contact the original authors for complete data. If the missing value of outcomes cannot be obtained from the original author, we will delete the comparison results related to the missing data and fully consider the risk of bias. Besides, sensitivity analyses will be performed by repeating the main analysis with an imputed dataset using multiple imputation by chained equations.<sup>24</sup>

### ***Assessment of risk of bias***

According to the Cochrane Collaboration's tool for assessing the risk of bias in randomized trials,<sup>25</sup> we will assess the risk of bias in the included literature from the following seven items: ①random sequence generation; ②allocation concealment; ③participant and personnel blinding; ④outcome assessment blinding; ⑤incomplete outcome data; ⑥selective reporting; and ⑦other bias. The results of the risk of bias assessment include the low risk of bias, the high risk of bias, and the unclear risk of bias. This process will be done independently by two investigators (SS Lin and QY Shi) and cross-checked. Disagreement will be determined through discussion between the two investigators. When consensus cannot be reached, a third investigator (FW Yang) will assist in the judgment. When there is a difference in the risk of bias between studies, we will try to analyze the impact of risk of bias. The risk of bias graph and the risk of bias summary will be generated by RevMan 5.3.

### **Data analysis**

#### ***Pairwise meta-analysis and network meta-analysis***

A Bayesian approach will be used to conduct pairwise meta-analyses and network meta-analyses according to the Markov chain Monte Carlo (MCMC) method.<sup>21</sup> In a Bayesian hierarchical framework, we will assume the vague prior distribution parameters for the between-study heterogeneity with uniform distribution in advance. The convergence of the model will be assessed using the Brooks-Gelman-Rubin plot.<sup>26</sup> Dichotomous variables will be presented as the relative risk (RR) or odds ratio (OR) with a 95% credible interval (CrI). Continuous variables will be presented as the weight mean difference (WMD) with a 95% CrI. The  $\chi^2$  test and  $I^2$  test will be conducted to assess the potential heterogeneity.  $P < 0.05$  is considered statistically significant. To achieve the highest generalisability in the pooled treatment effects, a random-effects model will

1 be used to synthesize the data for pairwise and network meta-analysis.<sup>27</sup> A pairwise meta-analysis will be conducted when  
2 at least two studies compared the same intervention and comparator. When the treatment nodes formed a network of  
3 evidence, we will do a TCMI to compare different treatment programs using the common comparator or placebo. A  
4 network diagram of each outcome will be generated to visualize the connections between different treatment programs  
5 included. If direct evidence exists, NMA will conduct a comprehensive evaluation of direct and indirect comparative  
6 evidence. If direct comparison evidence is lacking, we will only make adjusted indirect comparisons. For each outcome, a  
7 contribution matrix will be performed to demonstrate the percentage contribution of each direct comparison to the whole  
8 evidence body. The efficacy of different treatment programs will be ranked according to the surface under the cumulative  
9 ranking curve (SUCRA).<sup>28</sup> The SUCRA is a value range from 0 to 1 and can be re-expressed as a percentage. The larger  
10 the SUCRA, the better the treatment regimen.

### 14 ***Examination of assumptions in network meta-analysis***

15  
16  
17 ***Heterogeneity*** The Cochran Q statistics will be employed to assess heterogeneity.<sup>29</sup> If there is significant clinical  
18 heterogeneity or methodological heterogeneity ( $P < 0.1$ ,  $I^2 > 50\%$ ), the subgroup analysis will be performed to explore  
19 sources of heterogeneity. To assess potential bias resulting from baseline risk, we will perform meta-regression with  
20 regressors which included age of participants, sample size, duration of disease, course of treatment, and so on. Besides,  
21 sensitivity analyses will be performed by excluding studies with a high risk of bias or poor-quality to judge the stability of  
22 the results.

23  
24  
25  
26 ***Transitivity*** We will verify the transitivity of this network by plotting the central trends (e.g. mean, median) of patient  
27 characteristics in each treatment comparison.

28  
29  
30  
31 ***Consistency*** Node-splitting analysis will be used to split mixed evidence into direct evidence and indirect evidence to  
32 evaluate the inconsistency of the model. And then, we will compare the direct and indirect evidence. If there is no  
33 statistically significant difference between direct and indirect evidence, the study fits the consistency model. If the 95%  
34 CrI of the result does not include the invalid value, the inconsistency will be considered to exist.

### 35 ***Assessment of publication bias***

36  
37  
38 The comparison-adjusted funnel plots will be obtained with the specific ranking order to detect small sample size study  
39 effects and publication bias.

40  
41 All analyses will be conducted using R (version 3.6.1) with the *gemtc* package.

### 42 **Quality assessment and recommendation grading of the evidence**

43  
44  
45  
46 Two reviewers (SS Lin and QY Shi) will independently perform quality assessment and recommendation grading of the  
47 evidence of the direct, indirect and mixed estimates of all comparisons according to GRADE criteria.<sup>30, 31</sup> In particular, the  
48 GRADE system was used to rank the quality of evidence for direct comparison from four aspects: limitation, inconsistency,  
49 indirectness, and publication bias, but without imprecision.<sup>32</sup> The grading of the evidence quality includes four levels,  
50 which are 'high', 'medium', 'low' or 'very low' according to the GRADE rating standards.<sup>33, 34</sup> High indicates that the  
51 authors are very confident that the real effect is close to the estimate of the effect. Moderate indicates that the authors are  
52 moderately confident in the effect estimate: the true effect is likely to be close to the estimate of the effect, but there is a  
53 possibility that it is substantially different. Low indicates that the authors' confidence in the effect estimate is limited: the  
54 true effect may be substantially different from the estimate of the effect. Very low indicates that the authors have very little  
55 confidence in the effect estimate: the true effect is likely to be substantially different from the estimate of effect.<sup>29</sup> Cross-  
56 checking will be performed after the classification is completed. In case of disagreement, it will be decided by discussion  
57 between the two parties or judged by the third evaluator (FW Yang).

**Ethics and dissemination** This study will extract data from published literature and not involve private information from individuals or compromise their rights. Therefore, the study does not require ethical approval. The procedures of this systematic review and network meta-analysis will be conducted in accordance with the PRISMA guideline. Details of this study will be submitted to open access. The results will be published in a peer-reviewed journal and disseminated at relevant conferences.

**Acknowledgement** We would like to thank Luo-Qian Liu for the language revision.

**Contributions** SS Lin, JY Mao, and XL Wang conceived and designed the study together. SS Lin, QY Shi, and FW Yang developed the search strategy together. SS Lin drafted the protocol manuscript. All the authors have reviewed and approved the final manuscript.

**Funding** This work was supported by the "Innovation team development Plan" of the Ministry of Education-Research on the prevention and treatment of cardiovascular diseases in traditional Chinese medicine (No.IRT\_16R54), the Standardization project of the "Guidelines for Clinical Application of Traditional Chinese Medicines to Treat Advantageous Diseases" by the State Administration of Traditional Chinese Medicine (No.SATCM-2015-BZ[402]), and the National Administration of Traditional Chinese Medicine: 2019 Project of building evidence based practice capacity for TCM (No.2019XZZX-XXG007). The funder has not taken part in the study design, data collection and analysis, the decision to publish, or the preparation of the manuscript.

**Competing interests** None.

## REFERENCES

1. Chinese Society of Cardiology. Guidelines for diagnosis and treatment of heart failure in China 2018. Chinese Journal of Cardiology 2018;46:760. <https://www.chinahfc.org/statics/default/myfront/zn.pdf>
2. Ponikowski P, Voors AA, Anker SD, et al. 2016 ESC Guidelines for the diagnosis and treatment of acute and chronic heart failure. Eur Heart J 2016;37:2129-200. DOI: 10.1093/eurheartj/ehw128
3. Benjamin EJ, Muntner P, Alonso A, et al. Heart disease and stroke statistics-2019 update: a report from the American heart association. Circulation 2019;139:e56-e528. DOI: 10.1161/CIR.0000000000000659
4. Cook C, Cole G, Asaria P, Jabbour R, Francis DP. The annual global economic burden of heart failure. Int J Cardiol 2014;171:368-76. DOI: 10.1016/j.ijcard.2013.12.028
5. Lu Y, Wang AY, Wei ZH, Yu SY, Zhang WW. Exploring the thinking and methods of Chinese medicine based on "holistic view". World Science and Technology/Modernization of Traditional Chinese Medicine and Materia Medica 2019;21:1-7.  
<https://kns.cnki.net/KCMS/detail/detail.aspx?dbcode=CJFQ&dbname=CJFDLAST2019&filename=SJKX201901003&v=MDM4NjZZUzdEaDFUM3FUclDNMUZyQ1VSN3FmWnVSbkZDdmhXN3pQTmlmQWRyRzRIOWpNcm85Rlo0UjhlWDFMdxg=>
6. Yu SY, Lu Y. Discussion on action mechanisms of traditional Chinese medicine. Chinese Journal of Pharmacology and Toxicology 2018;32:347-54.  
<https://kns.cnki.net/KCMS/detail/detail.aspx?dbcode=CJFQ&dbname=CJFDLAST2018&filename=YLBS201805001&v=MzEwOTJxbzlgWllSOGVYMUx1eFITN0RoMVQzcVRyV00xRnJDVVI3cWZadVJuRkN2aFc3dk1QQ0hKZmJHNEg5bk0=>
7. Bian J, Li Z. Theory and clinical research progress of dual-direction regulation. Chinese Journal of Urban and Rural

- 1 Industrial Hygiene 2016;31:49-51.  
2 <https://kns.cnki.net/KCMS/detail/detail.aspx?dbcode=CJFQ&dbname=CJFDLAST2016&filename=ZCXW201609018&v=MTYxMzRya1VyeklQeTdUZWJHNEg5ZklwbzlfYkISOGVYMUxleFITN0RoMVQzcvRyV00xRnJDVVI3cWZadVJuRkM=>
- 3  
4  
5  
6
- 7 8. Ge MX, Feng YL, Zhang XX, Lv L, He HT. Meta-analysis of Salvia Miltiorrhiza Ligustrazine Injection combined  
8 with conventional medication in treatment of chronic heart failure. *Drug Evaluation Research* 2019;42:2084-91.  
9 <https://kns.cnki.net/KCMS/detail/detail.aspx?dbcode=CJFQ&dbname=CJFDLAST2019&filename=YWPJ201910034&v=MjgwMDNVUjdxZlp1Um5GQ3JrVTcvTFBEcmJaTEc0SDlqTnI0OUdZSVI4ZVgxTHV4WVM3RGgxVDNxVHJXTTFGckM=>
- 10  
11  
12  
13
- 14 9. Ou YW, Dong YJ, Zhu YL. Meta-analysis on Sofren Injection in treatment of heart failure. *Shanghai Journal of*  
15 *Traditional Chinese Medicine* 2019;53:37-43.  
16 <https://kns.cnki.net/KCMS/detail/detail.aspx?dbcode=CJFQ&dbname=CJFDLAST2019&filename=SHZZ201907015&v=MDAwNDYyQ1VSN3FmWnVSbkZDcmtVNzNNTmlYUmRMRzRIOWpNcUk5RVIZUjhlWDFMdxhZUzdEaDFUM3FUclDNMUY=>
- 17  
18  
19  
20
- 21 10. Xie N, Dai XH. Meta analysis on curative effects of Yiqi Fumai Injection (Lyophilization) for heart failure. *Chinese*  
22 *Journal of Integrative Medicine on Cardio-/Cerebrovascular Disease* 2019;17:1499-503.  
23 <https://kns.cnki.net/KCMS/detail/detail.aspx?dbcode=CJFQ&dbname=CJFDLAST2019&filename=ZYYY201910016&v=MDkwMTFOcjQ5RVlvUjhlWDFMdxhZUzdEaDFUM3FUclDNMUZyQ1VSN3FmWnVSbkZDcmtWYnJQUHpUU2Q3RzRIOWo=>
- 24  
25  
26  
27
- 28 11. Lin WJ, Li SS, Han JD, Qin YB, Wang LJ, Xian SX. The hemodynamic effects of Huangqi Injection in the  
29 treatment of chronic heart failure: a meta-analysis of clinical controlled trials. *Research and Practice on Chinese*  
30 *Medicines* 2019;33:63-8.  
31 <https://kns.cnki.net/KCMS/detail/detail.aspx?dbcode=CJFQ&dbname=CJFDLAST2019&filename=JZZY201901016&v=MTg2NDI1Um5GQ3JtVTd2Skx6ZlJkN0c0SDlqTXJvOUVZb1I4ZVgxTHV4WVM3RGgxVDNxVHJXTTFGckNVUjdxZlo=>
- 32  
33  
34  
35  
36
- 37 12. Zhu YH, Shen XX, Han QQ, Zhao J. A meta-analysis of Shenfu Injection in myocardial infarction with heart  
38 failure. *Chinese Journal of Evidence-Based Cardiovascular Medicine* 2018;10:402-406.  
39 <https://kns.cnki.net/KCMS/detail/detail.aspx?dbcode=CJFQ&dbname=CJFDLAST2018&filename=PZXX201804005&v=MTg0NjdmWnVSbkZDcm1WTHpOTIRmVGRyRzRIOW5NcTQ5RlIZUjhlWDFMdxhZUzdEaDFUM3FUclDNMUZyQ1VSN3E=>
- 40  
41  
42  
43
- 44 13. Xu T, Shi XQ, Wang F, Liu RX. Effectiveness and safety of Shenmai injection in the treatment of heart failure.  
45 *Journal of Community Medical* 2018;16:53-56.  
46 <https://kns.cnki.net/KCMS/detail/detail.aspx?dbcode=CJFQ&dbname=CJFDLAST2018&filename=SQYX201807022&v=MDYzMzRyVHJXTTFGckNVUjdxZlp1Um5GQ3JtV3JyTk5qelNkckc0SDluTXFJOUhab1I4ZVgxTHV4WVM3RGgxVDM=>
- 47  
48  
49  
50  
51
- 52 14. Wang KH, Wu JR, Duan XJ, Zhang D, Zhang XM, Zhang B. Meta-analysis on randomized controlled trials of  
53 Shenqi Fuzheng Injection in the treatment of chronic heart failure. *Chinese Journal of Pharmacoepidemiology*  
54 2018;27:27-32.  
55 <https://kns.cnki.net/KCMS/detail/detail.aspx?dbcode=CJFQ&dbname=CJFDLAST2018&filename=YWLX201801008&v=MjAzMDBlWDFMdxhZUzdEaDFUM3FUclDNMUZyQ1VSN3FmWnVSbkZDcm5VTHJPUERYSGRyRzRIOW5Ncm85RmJJUjg=>
- 56  
57  
58  
59
- 60 15. Lu XH, Zhang L, Wang JB, et al. Clinical efficacy and safety of xinmailong injection for the treatment of chronic  
heart failure: A meta-analysis. *Front Pharmacol* 2018;9:810. DOI: 10.3389/fphar.2018.00810



- 1 16. Wang K, Wu J, Duan X, et al. Huangqi injection in the treatment of chronic heart failure: A systematic review and  
2 meta-analysis. *Medicine (Baltimore)* 2017;96:e8167. DOI: 10.1097/MD.00000000000008167
- 3
- 4 17. Bai D, Yue GX, Wang RH, Miao Q, Xu J, Liu LM. Clinical characteristics of five traditional Chinese medicine  
5 injections in treating heart failure based on Meta-analysis literature. *Zhongguo Zhong Yao Za Zhi* 2018;43:4152-62.  
6 DOI: 10.19540/j.cnki.cjcm.20180709.002
- 7
- 8
- 9 18. Yang FW, Zou JH, Wang Y, et al. Network meta-analysis of Chinese medical injections for heart failure. *Zhongguo*  
10 *Zhong Yao Za Zhi* 2018;43:1247-53. DOI: 10.19540/j.cnki.cjcm.2018.0049
- 11
- 12 19. Wang KH, Wu JR, Zhang D, Duan XJ, Ni MW. Comparative efficacy of Chinese herbal injections for treating  
13 chronic heart failure: a network meta-analysis. *BMC Complement Altern Med* 2018;18:41. DOI: 10.1186/s12906-  
14 018-2090-3
- 15
- 16
- 17 20. Jonas DE, Wilkins TM, Bangdiwala S, et al. Findings of Bayesian mixed treatment comparison meta-analyses:  
18 comparison and exploration using real-world trial data and simulation. Rockville (MD): Agency for Healthcare  
19 Research and Quality (US) 2013;Report No.: 13-EHC039-EF. [https://pubmed.ncbi.nlm.nih.gov/23469378-findings-](https://pubmed.ncbi.nlm.nih.gov/23469378-findings-of-bayesian-mixed-treatment-comparison-meta-analyses-comparison-and-exploration-using-real-world-trial-data-and-simulation-internet/?from_single_result=Findings+of+Bayesian+Mixed+Treatment+Comparison+Meta-Analyses%3A+Comparison+and+Exploration+Using+Real-World+Trial+Data+and+Simulation)  
20 [of-bayesian-mixed-treatment-comparison-meta-analyses-comparison-and-exploration-using-real-world-trial-data-](https://pubmed.ncbi.nlm.nih.gov/23469378-findings-of-bayesian-mixed-treatment-comparison-meta-analyses-comparison-and-exploration-using-real-world-trial-data-and-simulation-internet/?from_single_result=Findings+of+Bayesian+Mixed+Treatment+Comparison+Meta-Analyses%3A+Comparison+and+Exploration+Using+Real-World+Trial+Data+and+Simulation)  
21 [and-simulation-internet/?from\\_single\\_result=Findings+of+Bayesian+Mixed+Treatment+Comparison+Meta-](https://pubmed.ncbi.nlm.nih.gov/23469378-findings-of-bayesian-mixed-treatment-comparison-meta-analyses-comparison-and-exploration-using-real-world-trial-data-and-simulation-internet/?from_single_result=Findings+of+Bayesian+Mixed+Treatment+Comparison+Meta-Analyses%3A+Comparison+and+Exploration+Using+Real-World+Trial+Data+and+Simulation)  
22 [Analyses%3A+Comparison+and+Exploration+Using+Real-World+Trial+Data+and+Simulation](https://pubmed.ncbi.nlm.nih.gov/23469378-findings-of-bayesian-mixed-treatment-comparison-meta-analyses-comparison-and-exploration-using-real-world-trial-data-and-simulation-internet/?from_single_result=Findings+of+Bayesian+Mixed+Treatment+Comparison+Meta-Analyses%3A+Comparison+and+Exploration+Using+Real-World+Trial+Data+and+Simulation)
- 23
- 24
- 25
- 26 21. Jansen JP, Crawford B, Bergman G, Stam W. Bayesian meta-analysis of multiple treatment comparisons: an  
27 introduction to mixed treatment comparisons. *Value in health: the journal of the International Society for*  
28 *Pharmacoeconomics and Outcomes Research* 2008;11:956-64. DOI: 10.1111/j.1524-4733.2008.00347.x
- 29
- 30 22. Higgins J and Thomas J (senior editors). *Cochrane Handbook for Systematic Reviews of Interventions Version 6.*  
31 updated 2019. <https://training.cochrane.org/handbook/current>
- 32
- 33 23. Moher D, Liberati A, Tetzlaff J, Altman DG, PRISMA Group. Preferred reporting items for systematic reviews and  
34 meta-analyses: the PRISMA statement. *Plos Med* 2009;6:e1000097. DOI: 10.1371/journal.pmed.1000097
- 35
- 36 24. van Buuren S, Groothuis-Oudshoorn K. Mice: Multivariate Imputation by Chained Equations in R. *Journal of*  
37 *Statistical Software* 2011;45:1-67. <https://www.jstatsoft.org/v045/i03>
- 38
- 39 25. Higgins JPT, Altman DG, Gøtzsche PC, et al. The Cochrane Collaboration's tool for assessing risk of bias in  
40 randomised trials. *BMJ (Clinical research ed.)* 2011;343:d5928. DOI: 10.1136/bmj.d5928
- 41
- 42 26. Brooks SP, Gelman A. General methods for monitoring convergence of iterative simulations. *J Comput Graph Stat*  
43 1998;7:434-455. <http://www2.stat.duke.edu/~scs/Courses/Stat376/Papers/ConvergeDiagnostics/BrooksGelman.pdf>
- 44
- 45 27. Dias S, Sutton AJ, Ades AE, Welton NJ. Evidence synthesis for decision making 2: a generalized linear modeling  
46 framework for pairwise and network meta-analysis of randomized controlled trials. *Med Decis Making* 2013;33:607-  
47 17. DOI: 10.1177/0272989X12458724
- 48
- 49 28. Rücker G, Schwarzer G. Ranking treatments in frequentist network meta-analysis works without resampling methods.  
50 *BMC Med Res Methodol* 2015;15:58. DOI: 10.1186/s12874-015-0060-8
- 51
- 52 29. Zheng H, Chen Q, Chen M, et al. Nonpharmacological conservative treatments for chronic functional constipation:  
53 A systematic review and network meta-analysis. *Neurogastroenterol Motil* 2019;31:e13441. DOI:  
54 10.1111/nmo.13441
- 55
- 56 30. Balshem H, Helfand M, Schünemann HJ, et al. GRADE guidelines: 3. Rating the quality of evidence. *J Clin*  
57 *Epidemiol* 2011;64:401-6. DOI: 10.1016/j.jclinepi.2010.07.015
- 58
- 59
- 60

- 1  
2  
3  
4  
5  
6  
7  
8  
9  
10  
11  
12  
13  
14  
15  
16  
17  
18  
19  
20  
21  
22  
23  
24  
25  
26  
27  
28  
29  
30  
31  
32  
33  
34  
35  
36  
37  
38  
39  
40  
41  
42  
43  
44  
45  
46  
47  
48  
49  
50  
51  
52  
53  
54  
55  
56  
57  
58  
59  
60
31. Puhan MA, Schünemann HJ, Murad MH, et al. A GRADE Working Group approach for rating the quality of treatment effect estimates from network meta-analysis. *BMJ (Clinical research ed.)* 2014;349:g5630. DOI: 10.1136/bmj.g5630
  32. Brignardello-Petersen R, Bonner A, Alexander PE, et al. Advances in the GRADE approach to rate the certainty in estimates from a network meta-analysis. *J Clin Epidemiol* 2018;93:36-44. DOI: 10.1016/j.jclinepi.2017.10.005
  33. Guyatt GH, Oxman AD, Schünemann HJ, Tugwell P, Knottnerus A. GRADE guidelines: a new series of articles in the *Journal of Clinical Epidemiology*. *J Clin Epidemiol* 2011;64:380-2. DOI: 10.1016/j.jclinepi.2010.09.011
  34. Guyatt GH, Oxman AD, Vist GE, et al. GRADE: an emerging consensus on rating quality of evidence and strength of recommendations. *BMJ (Clinical research ed.)* 2008;336:924-6. DOI: 10.1136/bmj.39489.470347.AD

For peer review only



1 **Figure caption**

2  
3  
4 Figure 1 Proposed flowchart of the literature search process

5  
6  
7  
8  
9  
10  
11  
12  
13  
14  
15  
16  
17  
18  
19  
20  
21  
22  
23  
24  
25  
26  
27  
28  
29  
30  
31  
32  
33  
34  
35  
36  
37  
38  
39  
40  
41  
42  
43  
44  
45  
46  
47  
48  
49  
50  
51  
52  
53  
54  
55  
56  
57  
58  
59  
60

For peer review only



Figure 1 Proposed flowchart of the literature search process

234x254mm (300 x 300 DPI)

## Annex 1 Search Strategy in PubMed

1  
2  
3  
4  
5  
6  
7  
8  
9  
10  
11  
12  
13  
14  
15  
16  
17  
18  
19  
20  
21  
22  
23  
24  
25  
26  
27  
28  
29  
30  
31  
32  
33  
34  
35  
36  
37  
38  
39  
40  
41  
42  
43  
44  
45  
46  
47  
48  
49  
50  
51  
52  
53  
54  
55  
56  
57  
58  
59  
60

| Search | Query                                                                                                                         | Items found |
|--------|-------------------------------------------------------------------------------------------------------------------------------|-------------|
| #1     | Heart Failure[MeSH Terms]                                                                                                     |             |
| #2     | heart failure[Title/Abstract]                                                                                                 |             |
| #3     | cardiac failure[Title/Abstract]                                                                                               |             |
| #4     | heart decompensation[Title/Abstract]                                                                                          |             |
| #5     | heart dysfunction[Title/Abstract]                                                                                             |             |
| #6     | cardiac dysfunction[Title/Abstract]                                                                                           |             |
| #7     | ventricular dysfunction[Title/Abstract]                                                                                       |             |
| #8     | heart dificiency[Title/Abstract]                                                                                              |             |
| #9     | cardiac dificiency[Title/Abstract]                                                                                            |             |
| #10    | heart insufficiency[Title/Abstract]                                                                                           |             |
| #11    | cardiac insufficiency[Title/Abstract]                                                                                         |             |
| #12    | #1 OR #2 OR #3 OR #4 OR #5 OR #6 OR #7 OR #8 OR #9 OR #10 OR #11                                                              |             |
| #13    | Medicine, Chinese Traditional[Mesh]                                                                                           |             |
| #14    | traditional Chinese medicine[All Fields]                                                                                      |             |
| #15    | Chinese traditional medicine[All Fields]                                                                                      |             |
| #16    | Chinese medicine[All Fields]                                                                                                  |             |
| #17    | Drugs, Chinese Herbal[Mesh]                                                                                                   |             |
| #18    | Chinese herbal drug\$[All Fields]                                                                                             |             |
| #19    | Chinese herbal medicine[All Fields]                                                                                           |             |
| #20    | Chinese patent drug\$[All Fields]                                                                                             |             |
| #21    | Chinese patent medicine[All Fields]                                                                                           |             |
| #22    | Chinese proprietary drug[All Fields]                                                                                          |             |
| #23    | Chinese proprietary medicine[All Fields]                                                                                      |             |
| #24    | Chinese crude drug\$[All Fields]                                                                                              |             |
| #25    | Chinese materia medica[All Fields]                                                                                            |             |
| #26    | traditional Chinese medicine patent prescription\$[All Fields]                                                                |             |
| #27    | traditional Chinese patent medicines and simple preparations[All Fields]                                                      |             |
| #28    | traditional Chinese medicine injection\$[All Fields]                                                                          |             |
| #29    | Chinese medicine injection\$[All Fields]                                                                                      |             |
| #30    | Complementary Therapies[MeSH]                                                                                                 |             |
| #31    | #13 OR #14 OR #15 OR #16 OR #17 OR #18 OR #19 OR #20 OR #21 OR #22 OR #23<br>OR #24 OR #25 OR #26 OR #27 OR #28 OR #29 OR #30 |             |
| #32    | Injections[MeSH]                                                                                                              |             |
| #33    | injection\$[Title/Abstract]                                                                                                   |             |
| #34    | injectable\$[Title/Abstract]                                                                                                  |             |
| #35    | #32 OR #33 OR #34                                                                                                             |             |
| #36    | Randomized Controlled Trials as Topic[Mesh]                                                                                   |             |
| #37    | Randomized Controlled Trial[Publication Type]                                                                                 |             |
| #38    | Controlled Clinical Trial[Publication Type]                                                                                   |             |
| #39    | Equivalence Trial[Publication Type]                                                                                           |             |
| #40    | randomized controlled trial[Title/Abstract]                                                                                   |             |
| #41    | Random Allocation[Mesh]                                                                                                       |             |
| #42    | Double-Blind Method[Mesh]                                                                                                     |             |
| #43    | Single-Blind Method[Mesh]                                                                                                     |             |
| #44    | Clinical Trial[Publication Type]                                                                                              |             |

1 #45 Research Design[Mesh]  
 2 #46 Placebos[Mesh]  
 3 #47 placebo\$[Title/Abstract]  
 4 #48 random\*[Title/Abstract]  
 5 #49 trial\$[Title]  
 6 #36 OR #37 OR #38 OR #39 OR #40 OR #41 OR #42 OR#43 OR #44 OR #45 OR #46  
 7 #50 OR #47 OR #48 OR #49  
 8 #51 Systemic Review[Publication Type]  
 9 #52 systemic review[Title/Abstract]  
 10 #53 systemic literature review[Title/Abstract]  
 11 #54 Meta Analysis[Publication Type]  
 12 #55 Meta analysis[Title/Abstract]  
 13 #56 Meta-analysis[Publication Type]  
 14 #57 Meta-analysis[Title/Abstract]  
 15 #58 pooled analysis[Title/Abstract]  
 16 #59 Consensus Development Conference as Topic[Mesh]  
 17 #60 Consensus Development Conference[Publication Type]  
 18 #61 consensus development conference[Title/Abstract]  
 19 #62 expert consensus[Title/Abstract]  
 20 #63 Practice Guideline as Topic[Mesh]  
 21 #64 Practice Guideline[Publication Type]  
 22 #65 practice guideline[Title/Abstract]  
 23 #66 Cochrane database systemic review[Title/Abstract]  
 24 #67 Evidence-based Medicine[Mesh]  
 25 #68 evidence-based medicine[Title/Abstract]  
 26 #69 best practice[Title/Abstract]  
 27 #70 evidence synthesis[Title/Abstract]  
 28 #71 synthesis analysis[Title/Abstract]  
 29 #51 OR #52 OR #53 OR #54 OR #55 OR #56 OR #57 OR #58 OR #59 OR #60 OR #61  
 30 #72 OR #62 OR #63 OR #64 OR #65 OR #66 OR #67 OR #68 OR #69 OR #70 OR #71  
 31 #73 #12 AND #31 AND #35 AND #50 AND #72

---

41  
42  
43  
44  
45  
46  
47  
48  
49  
50  
51  
52  
53  
54  
55  
56  
57  
58  
59  
60

**PRISMA-P (Preferred Reporting Items for Systematic review and Meta-Analysis Protocols) 2015 checklist: recommended items to address in a systematic review protocol\***

| Section and topic                 | Item No | Checklist item                                                                                                                                                                                                                | Addressed on page number                          |
|-----------------------------------|---------|-------------------------------------------------------------------------------------------------------------------------------------------------------------------------------------------------------------------------------|---------------------------------------------------|
| <b>ADMINISTRATIVE INFORMATION</b> |         |                                                                                                                                                                                                                               |                                                   |
| Title:                            |         |                                                                                                                                                                                                                               |                                                   |
| Identification                    | 1a      | Identify the report as a protocol of a systematic review                                                                                                                                                                      | 1                                                 |
| Update                            | 1b      | If the protocol is for an update of a previous systematic review, identify as such                                                                                                                                            | Not applicable.                                   |
| Registration                      | 2       | If registered, provide the name of the registry (such as PROSPERO) and registration number                                                                                                                                    | 2<br>Trial registration number:<br>CRD42020166900 |
| Authors:                          |         |                                                                                                                                                                                                                               |                                                   |
| Contact                           | 3a      | Provide name, institutional affiliation, e-mail address of all protocol authors; provide physical mailing address of corresponding author                                                                                     | 1                                                 |
| Contributions                     | 3b      | Describe contributions of protocol authors and identify the guarantor of the review                                                                                                                                           | 7                                                 |
| Amendments                        | 4       | If the protocol represents an amendment of a previously completed or published protocol, identify as such and list changes; otherwise, state plan for documenting important protocol amendments                               | Not applicable.                                   |
| Support:                          |         |                                                                                                                                                                                                                               |                                                   |
| Sources                           | 5a      | Indicate sources of financial or other support for the review                                                                                                                                                                 | 7                                                 |
| Sponsor                           | 5b      | Provide name for the review funder and/or sponsor                                                                                                                                                                             | 7                                                 |
| Role of sponsor or funder         | 5c      | Describe roles of funder(s), sponsor(s), and/or institution(s), if any, in developing the protocol                                                                                                                            | 7                                                 |
| <b>INTRODUCTION</b>               |         |                                                                                                                                                                                                                               |                                                   |
| Rationale                         | 6       | Describe the rationale for the review in the context of what is already known                                                                                                                                                 | 2-3                                               |
| Objectives                        | 7       | Provide an explicit statement of the question(s) the review will address with reference to participants, interventions, comparators, and outcomes (PICO)                                                                      | 3                                                 |
| <b>METHODS</b>                    |         |                                                                                                                                                                                                                               |                                                   |
| Eligibility criteria              | 8       | Specify the study characteristics (such as PICO, study design, setting, time frame) and report characteristics (such as years considered, language, publication status) to be used as criteria for eligibility for the review | 3-4                                               |
| Information sources               | 9       | Describe all intended information sources (such as electronic databases, contact with study authors, trial registers)                                                                                                         | 4-5                                               |

|                                    |     |                                                                                                                                                                                                                                                  |     |
|------------------------------------|-----|--------------------------------------------------------------------------------------------------------------------------------------------------------------------------------------------------------------------------------------------------|-----|
|                                    |     | or other grey literature sources) with planned dates of coverage                                                                                                                                                                                 |     |
| Search strategy                    | 10  | Present draft of search strategy to be used for at least one electronic database, including planned limits, such that it could be repeated                                                                                                       | 4-5 |
| Study records:                     |     |                                                                                                                                                                                                                                                  |     |
| Data management                    | 11a | Describe the mechanism(s) that will be used to manage records and data throughout the review                                                                                                                                                     | 5   |
| Selection process                  | 11b | State the process that will be used for selecting studies (such as two independent reviewers) through each phase of the review (that is, screening, eligibility and inclusion in meta-analysis)                                                  | 5   |
| Data collection process            | 11c | Describe planned method of extracting data from reports (such as piloting forms, done independently, in duplicate), any processes for obtaining and confirming data from investigators                                                           | 5   |
| Data items                         | 12  | List and define all variables for which data will be sought (such as PICO items, funding sources), any pre-planned data assumptions and simplifications                                                                                          | 5   |
| Outcomes and prioritization        | 13  | List and define all outcomes for which data will be sought, including prioritization of main and additional outcomes, with rationale                                                                                                             | 4   |
| Risk of bias in individual studies | 14  | Describe anticipated methods for assessing risk of bias of individual studies, including whether this will be done at the outcome or study level, or both; state how this information will be used in data synthesis                             | 6   |
| Data synthesis                     | 15a | Describe criteria under which study data will be quantitatively synthesised                                                                                                                                                                      | 6   |
|                                    | 15b | If data are appropriate for quantitative synthesis, describe planned summary measures, methods of handling data and methods of combining data from studies, including any planned exploration of consistency (such as $I^2$ , Kendall's $\tau$ ) | 6   |
|                                    | 15c | Describe any proposed additional analyses (such as sensitivity or subgroup analyses, meta-regression)                                                                                                                                            | 6   |
|                                    | 15d | If quantitative synthesis is not appropriate, describe the type of summary planned                                                                                                                                                               | 6   |
| Meta-bias(es)                      | 16  | Specify any planned assessment of meta-bias(es) (such as publication bias across studies, selective reporting within studies)                                                                                                                    | 7   |
| Confidence in cumulative evidence  | 17  | Describe how the strength of the body of evidence will be assessed (such as GRADE)                                                                                                                                                               | 7   |

**\* It is strongly recommended that this checklist be read in conjunction with the PRISMA-P Explanation and Elaboration (cite when available) for important clarification on the items. Amendments to a review protocol should be tracked and dated. The copyright for PRISMA-P (including checklist) is held by the PRISMA-P Group and is distributed under a Creative Commons Attribution Licence 4.0.**

*From: Shamseer L, Moher D, Clarke M, Ghersi D, Liberati A, Petticrew M, Shekelle P, Stewart L, PRISMA-P Group. Preferred reporting items for systematic review and meta-analysis protocols (PRISMA-P) 2015: elaboration and explanation. BMJ. 2015 Jan 2;349(jan02 1):g7647.*
