# Supplementary material for: Traditional Chinese medicine injections for heart failure: a protocol for systematic review and network meta-analysis of randomised controlled trials
Source: PubMed Central journal article supplement — BMJ Open. 2020 Sep 28;10(9):e037331. doi: 10.1136/bmjopen-2020-037331 (PMC7523221; doi:10.1136/bmjopen-2020-037331), 2020-09-28
Supplement: bmjopen-2020-037331supp001.pdf [file bmjopen-2020-037331supp001.pdf]

## Annex 1 Search Strategy in PubMed

| Search | Query                                                                                                                         | Items found |
|--------|-------------------------------------------------------------------------------------------------------------------------------|-------------|
| #1     | Heart Failure[MeSH Terms]                                                                                                     |             |
| #2     | heart failure[Title/Abstract]                                                                                                 |             |
| #3     | cardiac failure[Title/Abstract]                                                                                               |             |
| #4     | heart decompensation[Title/Abstract]                                                                                          |             |
| #5     | heart dysfunction[Title/Abstract]                                                                                             |             |
| #6     | cardiac dysfunction[Title/Abstract]                                                                                           |             |
| #7     | ventricular dysfunction[Title/Abstract]                                                                                       |             |
| #8     | heart dificiency[Title/Abstract]                                                                                              |             |
| #9     | cardiac dificiency[Title/Abstract]                                                                                            |             |
| #10    | heart insufficiency[Title/Abstract]                                                                                           |             |
| #11    | cardiac insufficiency[Title/Abstract]                                                                                         |             |
| #12    | #1 OR #2 OR #3 OR #4 OR #5 OR #6 OR #7 OR #8 OR #9 OR #10 OR #11                                                              |             |
| #13    | Medicine, Chinese Traditional[Mesh]                                                                                           |             |
| #14    | traditional Chinese medicine[All Fields]                                                                                      |             |
| #15    | Chinese traditional medicine[All Fields]                                                                                      |             |
| #16    | Chinese medicine[All Fields]                                                                                                  |             |
| #17    | Drugs, Chinese Herbal[Mesh]                                                                                                   |             |
| #18    | Chinese herbal drug\$[All Fields]                                                                                             |             |
| #19    | Chinese herbal medicine[All Fields]                                                                                           |             |
| #20    | Chinese patent drug\$[All Fields]                                                                                             |             |
| #21    | Chinese patent medicine[All Fields]                                                                                           |             |
| #22    | Chinese proprietary drug[All Fields]                                                                                          |             |
| #23    | Chinese proprietary medicine[All Fields]                                                                                      |             |
| #24    | Chinese crude drug\$[All Fields]                                                                                              |             |
| #25    | Chinese materia medica[All Fields]                                                                                            |             |
| #26    | traditional Chinese medicine patent prescription\$[All Fields]                                                                |             |
| #27    | traditional Chinese patent medicines and simple preparations[All Fields]                                                      |             |
| #28    | traditional Chinese medicine injection\$[All Fields]                                                                          |             |
| #29    | Chinese medicine injection\$[All Fields]                                                                                      |             |
| #30    | Complementary Therapies[MeSH]                                                                                                 |             |
| #31    | #13 OR #14 OR #15 OR #16 OR #17 OR #18 OR #19 OR #20 OR #21 OR #22 OR #23<br>OR #24 OR #25 OR #26 OR #27 OR #28 OR #29 OR #30 |             |
| #32    | Injections[MeSH]                                                                                                              |             |
| #33    | injection\$[Title/Abstract]                                                                                                   |             |
| #34    | injectable\$[Title/Abstract]                                                                                                  |             |
| #35    | #32 OR #33 OR #34                                                                                                             |             |
| #36    | Randomized Controlled Trials as Topic[Mesh]                                                                                   |             |
| #37    | Randomized Controlled Trial[Publication Type]                                                                                 |             |
| #38    | Controlled Clinical Trial[Publication Type]                                                                                   |             |
| #39    | Equivalence Trial[Publication Type]                                                                                           |             |
| #40    | randomized controlled trial[Title/Abstract]                                                                                   |             |
| #41    | Random Allocation[Mesh]                                                                                                       |             |
| #42    | Double-Blind Method[Mesh]                                                                                                     |             |
| #43    | Single-Blind Method[Mesh]                                                                                                     |             |
| #44    | Clinical Trial[Publication Type]                                                                                              |             |

#45 Research Design[Mesh]  
#46 Placebos[Mesh]  
#47 placebo\$[Title/Abstract]  
#48 random\*[Title/Abstract]  
#49 trial\$[Title]  
#50 #36 OR #37 OR #38 OR #39 OR #40 OR #41 OR #42 OR#43 OR #44 OR #45 OR #46  
OR #47 OR #48 OR #49  
#51 Systemic Review[Publication Type]  
#52 systemic review[Title/Abstract]  
#53 systemic literature review[Title/Abstract]  
#54 Meta Analysis[Publication Type]  
#55 Meta analysis[Title/Abstract]  
#56 Meta-analysis[Publication Type]  
#57 Meta-analysis[Title/Abstract]  
#58 pooled analysis[Title/Abstract]  
#59 Consensus Development Conference as Topic[Mesh]  
#60 Consensus Development Conference[Publication Type]  
#61 consensus development conference[Title/Abstract]  
#62 expert consensus[Title/Abstract]  
#63 Practice Guideline as Topic[Mesh]  
#64 Practice Guideline[Publication Type]  
#65 practice guideline[Title/Abstract]  
#66 Cochrane database systemic review[Title/Abstract]  
#67 Evidence-based Medicine[Mesh]  
#68 evidence-based medicine[Title/Abstract]  
#69 best practice[Title/Abstract]  
#70 evidence synthesis[Title/Abstract]  
#71 synthesis analysis[Title/Abstract]  
#72 #51 OR #52 OR #53 OR #54 OR #55 OR #56 OR #57 OR #58 OR #59 OR #60 OR #61  
OR #62 OR #63 OR #64 OR #65 OR #66 OR #67 OR #68 OR #69 OR #70 OR #71  
#73 #12 AND #31 AND #35 AND #50 AND #72

---
